1 **Human brain-derived A $\beta$  oligomers bind to synapses and**  
2 **disrupt synaptic activity in a manner that requires APP**

3

4 Zemin Wang<sup>1</sup>, Rosemary J. Jackson<sup>2</sup>, Wei Hong<sup>1</sup>, Taylor M. Walter<sup>1</sup>, Arturo Moreno<sup>1</sup>,  
5 Wen Liu<sup>1</sup>, Shaomin Li<sup>1</sup>, Matthew P. Frosch<sup>3</sup>, Inna Slutsky<sup>4</sup>, Tracy Young-Pearse<sup>1</sup>, Tara  
6 L. Spires-Jones<sup>2</sup>, and Dominic M. Walsh<sup>1\*</sup>

7

8 <sup>1</sup>Laboratory for Neurodegenerative Research, Ann Romney Center for Neurologic  
9 Diseases, Brigham and Women's Hospital and Harvard Medical School, Boston, MA  
10 02115, USA; <sup>2</sup>The University of Edinburgh Centre for Cognitive and Neural Systems  
11 and the Euan MacDonald Centre for Motor Neurone Disease Research, 1 George  
12 Square, Edinburgh, UK; <sup>3</sup>Massachusetts General Hospital and Harvard Medical School,  
13 Massachusetts General Institute for Neurodegenerative Disease, Charlestown, MA  
14 02129, USA; and <sup>4</sup>Department of Physiology and Pharmacology, Sackler Faculty of  
15 Medicine, Tel Aviv University; 69978 Tel Aviv, Israel.

16

17 \*Correspondence to [dwalsh3@bwh.harvard.edu](mailto:dwalsh3@bwh.harvard.edu)

18

19 Running title: A $\beta$ -mediated disruption of synaptic activity requires APP.

20

21 Number of words for Abstract: 146

22 Number of words for Introduction: 895

23 Number of words for Discussion: 1239

24

## 25 **Acknowledgments**

26 We thank Dr. Tiernan T. O'Malley for useful discussions and technical advice. This  
27 work was supported by grants to DMW from the National Institutes of Health  
28 (AG046275), Bright Focus, and the United States-Israel Binational Science Foundation  
29 (2013244, DMW and IS); grants to TSJ from Alzheimer's Research UK and the Scottish  
30 Government (ARUK-SPG2013-1), Wellcome Trust-University of Edinburgh Institutional  
31 Strategic Support funds, and the H2020 European Research Council (ALZSYN); and to  
32 the Massachusetts Alzheimer's Disease Research Center (AG05134).

1 **Abstract**

2 Compelling genetic evidence links the amyloid precursor protein (APP) to Alzheimer's  
3 disease (AD), and several theories have been advanced to explain the involvement of  
4 APP in AD. A leading hypothesis proposes that a small amphipathic fragment of APP,  
5 the amyloid  $\beta$ -protein ( $A\beta$ ), self-associates to form soluble aggregates which impair  
6 synaptic and network activity. Here, we report on the plasticity-disrupting effects of  $A\beta$   
7 isolated from AD brain and the requirement of APP for these effects. We show that  $A\beta$ -  
8 containing AD brain extracts block hippocampal long-term potentiation (LTP), augment  
9 glutamate release probability and disrupt the excitation/inhibition balance. Notably,  
10 these effects are associated with  $A\beta$  localizing to synapses, and genetic ablation of APP  
11 prevents both  $A\beta$  binding and  $A\beta$ -mediated synaptic dysfunctions. These findings  
12 indicate a role for APP in AD pathogenesis beyond the generation of  $A\beta$  and suggest  
13 modulation of APP expression as a therapy for AD.

14

## 15 **Introduction**

16 Mutation, over-expression or altered-processing of the amyloid precursor protein (APP)  
17 underlie all known monogenic cases of familial Alzheimer's disease (fAD) (Tanzi, 2012;  
18 Guerreiro and Hardy, 2014). Although the physiological roles of APP are not fully  
19 understood, myriad studies indicate that APP plays a role in synaptic plasticity, dendritic  
20 morphogenesis, and neuroprotection (Muller and Zheng, 2012). Membrane-tethered  
21 APP can act as a cell-adhesion molecule linking the pre-and post-synapse (Soba et al.,  
22 2005) and APP has been shown to regulate synaptic vesicle proteins, synaptic  
23 transmission and plasticity (Seabrook et al., 1999; Lassek et al., 2013; Fanutza et al.,  
24 2015; Lassek et al., 2016). In the dentate gyrus (DG) of rat, APP expression is known  
25 to change during memory consolidation (Conboy et al., 2005) and intraventricular  
26 administration of anti-APP antibodies or antisense oligonucleotides results in profound  
27 amnesia (Doyle et al., 1990; Huber et al., 1993; Mileusnic et al., 2000). Notably, APP is  
28 a component of the presynaptic GABA-B1a receptor (GABA<sub>B1a</sub>-R) complex (Bai et al.,  
29 2008; Schwenk et al., 2016) and neuron-type specific knock-out of APP indicates an  
30 important role for APP in GABAergic transmission and maintenance of the excitatory–  
31 inhibitory balance (Wang et al., 2014).

32 APP is a complex molecule that undergoes substantial post-translational modification  
33 and processing. More than 10 different proteolytic fragments of APP have been  
34 identified (Weidemann et al., 1989; Esch et al., 1990; Golde et al., 1992; Haass et al.,  
35 1992; Sisodia, 1992; Portelius et al., 2013; Welzel et al., 2014; Willem et al., 2015).  
36 Several of these are suggested to be pathogenic (Neve and McPhie, 2007; Yankner

37 and Lu, 2009; Tamayev et al., 2012; Willem et al., 2015), whereas others are  
38 neuroprotective (Mockett et al., 2017). The fragment from which the precursor protein  
39 derives its name, the amyloid  $\beta$ -protein (A $\beta$ ), is found in the tell-tale amyloid plaques  
40 which litter the brains of individuals who die with AD. A $\beta$  comprises a family of APP-  
41 derived peptides that share a common core of ~30 amino acids (Walsh and Teplow,  
42 2012) which are produced by the concerted action of two aspartyl proteases,  $\beta$ -  
43 secretase and  $\gamma$ -secretase (De Strooper, 2010). A $\beta$  peptides are prone to self-associate  
44 and multiple studies indicate that certain forms of A $\beta$  adversely affect synaptic form and  
45 function (Shankar and Walsh, 2009).

46 The synaptotoxic activity of A $\beta$  and the involvement of APP in synapse formation and  
47 activity are particularly relevant to AD since *in vivo* and postmortem studies indicate that  
48 synapse dysfunction and loss are prominent early features of AD (Scheff et al., 2006;  
49 Scheff et al., 2007; Johnson et al., 2012). Transgenic (tg) mice over-expressing APP  
50 either alone, or in combination with PS1, produce high levels of A $\beta$ , deposit amyloid  
51 plaques, and exhibit deficits in learning and memory (Ashe and Zahs, 2010). Certain  
52 APP tgs also manifest aberrant changes in synapses, neuronal microcircuits and  
53 complex networks (Palop and Mucke, 2016) and some authors have sought to link the  
54 network hyperactivity observed in APP tgs with epileptiform changes detected in a  
55 segment of individuals with early stage AD (Palop and Mucke, 2009; Busche and  
56 Konnerth, 2015). However, there is no human parallel for the high level of APP over-  
57 expression seen in APP tg mice. This supraphysiological production of APP induces  
58 artifacts such as increased mortality and behavioral hyperactivity (Ashe and Zahs, 2010;

59 Nilsson et al., 2014), and it is difficult to differentiate between effects mediated by A $\beta$ ,  
60 APP, or non-A $\beta$  APP derivatives (Seabrook et al., 1999). Indeed, there is now evidence  
61 that the epileptiform changes seen in APP tgs, that had formerly been attributed to A $\beta$ ,  
62 are in fact mediated by non-A $\beta$  APP derivatives (Born et al., 2014). Surprisingly, mice  
63 which produce and deposit human A $\beta$ , but do not over-express human APP (i.e. APP  
64 knock-in mice or BRI2-A $\beta$  mice) show no changes in electroencephalogram (EEG)  
65 activity or deficits in synaptic plasticity (Kim et al., 2013; Born et al., 2014).

66 Acute studies in wild type rodents show that non-fibrillar, water-soluble A $\beta$  from a variety  
67 of sources are potent synaptotoxins (Lambert et al., 1998; Walsh et al., 2002; Cleary et  
68 al., 2005; Klyubin et al., 2008; Minkeviciene et al., 2009; Kurudenkandy et al., 2014).  
69 Furthermore, *in vitro* and *in vivo* studies demonstrate that the most disease-relevant  
70 form of non-fibrillar A $\beta$ , A $\beta$  extracted from the water-soluble phase of AD brain, inhibits  
71 long-term potentiation (LTP), facilitates long-term depression (LTD), reduces synaptic  
72 remodeling, and impairs memory consolidation (Shankar et al., 2008; Barry et al., 2011;  
73 Freir et al., 2011; Borlikova et al., 2013; Hu et al., 2014; Yang et al., 2017). Here, we  
74 show that the block of LTP mediated by A $\beta$ -containing AD brain extracts is  
75 accompanied by opposing changes in excitatory and inhibitory pre-synaptic release  
76 probabilities and consequent disruption of the excitation/inhibition (E/I) balance. The  
77 net increase in the E/I ratio and inhibition of LTP require expression of APP and are  
78 associated with A $\beta$  localizing to synapses. These findings suggest a link between A $\beta$   
79 toxicity and perturbation of the normal regulatory role of APP, and are consistent with  
80 prior studies which have imputed a role for APP in A $\beta$  toxicity (White et al., 1998;  
81 Lorenzo et al., 2000; Shaked et al., 2006; Sola Vigo et al., 2009; Fogel et al., 2014;

82 Kirouac et al., 2017). In light of these results we suggest that down-regulation of APP  
83 expression or modulation of its interaction with synaptotoxic A $\beta$  species should be  
84 investigated as an approach to treat AD.

85

## 86 **Results**

87 We previously reported that aqueous extracts of certain end-stage AD brains block  
88 hippocampal LTP *in vivo* and *in vitro* (Shankar et al., 2008; Li et al., 2009; Barry et al.,  
89 2011; Freir et al., 2011; Hu et al., 2014). Here we further investigated the mechanism of  
90 this effect and the requirement of endogenous APP.

91

92 **The water-soluble extract from AD brain contains both A $\beta$  monomers and**  
93 **oligomers and blocks LTP in a manner dependent on A $\beta$ .**

94 Brain extracts were prepared as described and a portion was immunodepleted (ID) of  
95 A $\beta$  or mock-ID with pre-immune rabbit serum. Here, the mock-ID extract is referred to  
96 as the AD sample, and the material depleted of A $\beta$  as ID-AD. ID-AD and AD samples  
97 were analyzed using IP/WB, and MSD immunoassays that preferentially recognize  
98 either A $\beta$  oligomers (oAssay) or A $\beta$ 42 monomers (Mc Donald et al., 2015). IP/WB  
99 analysis allows the capture of A $\beta$  structures under native conditions and their detection  
100 following denaturing SDS-PAGE. The A $\beta$  present in the AD sample migrated on SDS-  
101 PAGE with molecular weights of ~4 and ~7-8 kDa (Figure 1A) — a pattern we have  
102 seen in aqueous extracts of more than 100 AD brains analyzed in our laboratory (Mc  
103 Donald et al., 2015). Since SDS-PAGE is highly denaturing, the ~4 and ~7 kDa species  
104 do not necessarily reflect native A $\beta$  species. Rather, these simply indicate that at least  
105 two different A $\beta$  species are present. The same samples were treated plus or minus 5  
106 M GuHCl and then analyzed using MSD assays. In prior studies we found that GuHCl



107 effectively disaggregates high molecular weight A $\beta$  species such that the signal  
108 detected by our oAssay is greatly decreased, whereas the signal detected by the  
109 monomer-preferring A $\beta$ x-42 immunoassay is proportionately increased (Mc Donald et  
110 al., 2015). A similar outcome was evident when the extract of AD1 was treated with  
111 GuHCl (Figure 1B). Specifically, GuHCl treatment caused a ~70% decrease in the  
112 oligomer signal and a more than 8-fold increase in the monomer signal. Together these  
113 immunoassay and IP/WB results indicate that the majority of A $\beta$  in the AD1 extract exist  
114 as labile aggregates made up of ~4 kDa A $\beta$  and ~7 kDa A $\beta$ . Importantly, AW7 ID  
115 effectively removed the large majority of the various A $\beta$  species detected (Figure 1A  
116 and B). For instance, AW7 ID reduced the oligomer signal from  $5.1 \pm 0.03$  ng/ml to  $0.32$   
117  $\pm 0.12$  ng/ml (Figure 1B, left panel) and monomer from  $3.42 \pm 0.03$  ng/ml to  $0.12 \pm 0.04$   
118 ng/ml (Figure 1B, right panel).

119 For slices that received vehicle aCSF-B (Control), TBS induced strong potentiation  
120 which lasted the whole recording period (Figure 1C, black dots,  $181.1 \pm 10.7$  %,  $n = 17$ ),  
121 and ID-AD allowed a similar response (green downward triangles,  $173.6 \pm 8.7$  %,  $n = 11$ ,  
122  $p = 0.12$ , One Way ANOVA test) (Figure 1C and D). Consistent with prior reports  
123 (Shankar et al., 2008; Freir et al., 2011), application of the AD1 extract significantly  
124 decreased LTP compared to both the Control and ID-AD treatment (red diamonds,  $136$   
125  $\pm 4.2$  %,  $n = 18$ ,  $F = 4.26$ ,  $p = 6.98E-9$  AD vs. Control;  $F = 4.14$ ,  $p = 3.56E-12$  AD vs. ID-AD,  
126 One Way ANOVA test). The fact that the ID-AD and AD samples are identical except  
127 that the latter contains more A $\beta$  than the former, is evidence that some form of A $\beta$  is  
128 responsible for the block of LTP induced by the AD1 extract.

## 129 **A $\beta$ -containing AD brain extract affects presynaptic release probabilities**

130 Accumulating evidence indicates that soluble A $\beta$  species may interact with excitatory  
131 and inhibitory presynaptic terminals, modulate neurotransmitter release and cause  
132 synaptic dysfunction in the very early stages of AD (Nimmrich et al., 2008; Abramov et  
133 al., 2009; Kabogo et al., 2010; Parodi et al., 2010; Russell et al., 2012; Sokolow et al.,  
134 2012; Huang et al., 2013; Ripoli et al., 2013; Kurudenkandy et al., 2014). Although the  
135 effects of A $\beta$  on LTP are well established (Klyubin et al., 2012), little is known about  
136 whether and how A $\beta$ -containing AD extracts affect pre- and post-synaptic elements. To  
137 investigate affects on presynaptic release, we measured short-term synaptic facilitation  
138 (Zucker and Regehr, 2002) in slices before and 30 min after treatment with AD extract.  
139 As synapse release probability is inversely correlated to synaptic facilitation (Zucker and  
140 Regehr, 2002), we employed high-frequency burst stimulation (5 pulses with 20 ms  
141 intra-burst stimulus interval). Application of AD extract induced a reduction in the short-  
142 term facilitation during burst stimulation (Figure 1E-F). When responses were  
143 normalized based on the ratio of each fEPSP to the first response, we found that  
144 treatment with AD extract had no effect on the 2<sup>nd</sup> response, but significantly decreased  
145 the 3<sup>rd</sup>, 4<sup>th</sup>, and 5<sup>th</sup> response (red dots,  $p= 0.02$  at 3<sup>rd</sup> stimulation,  $p= 0.004$  at 4<sup>th</sup>  
146 stimulation and  $p= 0.004$  at 5<sup>th</sup> stimulation,  $n = 6$ , student t-test, and also by group and  
147 time with Two way ANOVA,  $F(4,7)=6.39$ ,  $p=0.006$ ) (Figure 1F). In contrast, the slices  
148 treated with ID-AD yielded a pattern highly similar to that obtained with aCSF-B control  
149 (data not show). Thus, A $\beta$  in the AD extract caused a reduction in short-term synaptic  
150 plasticity due to an initial increase in pre-synaptic glutamate release.

## 151 **A $\beta$ -containing AD brain extract disrupts the excitation-to-inhibition balance**

152 To estimate the effect of A $\beta$  on the total synaptic input at the single-neuron level, we  
153 used whole-cell voltage clamp recordings to measure spontaneous excitatory  
154 postsynaptic currents (sEPSCs) on CA1 pyramidal neurons before and 30 min after  
155 addition of AD extract. The holding potential was kept constant at -70 mV and sEPSCs  
156 measured before and 30 min after addition of AD extract – this 30 min interval was  
157 chosen to match the pre-incubation time used in our LTP and short-term facilitation  
158 experiments. Application of the AD extract significantly decreased the inter-event  
159 interval ( $p=1.65E-6$ , K-S test) and increased the mean frequency of sEPSCs (from  $1.8 \pm$   
160  $0.2$  Hz to  $2.7 \pm 0.3$  Hz,  $p=0.02$ ,  $n = 7$ , students t-test) (Figure 2A and B), but did not alter  
161 the sEPSCs amplitude (mean amplitude from  $11.7 \pm 1.8$  pA to  $10.1 \pm 1.6$  pA,  $p= 0.65$ ,  $n$   
162  $= 7$ , student t-test) (Fig 2A and C). In contrast, the ID-AD sample had no effect on the  
163 frequency or the amplitude of sEPSCs (mean frequency: from  $2.2 \pm 0.5$  Hz to  $2.3 \pm 0.7$   
164 Hz, mean amplitude: from  $9.7 \pm 1.7$  pA to  $10.2 \pm 1.4$  pA,  $p=0.45$ ,  $n = 6$ , student t-test)  
165 (Figure 2D–F). These results indicate that the AD brain-derived A $\beta$  significantly  
166 augments excitatory synaptic input on CA1 pyramidal neurons.

167 Pyramidal neurons receive both excitatory (sEPSCs) and inhibitory (sIPSCs) inputs and  
168 GABAergic axon terminals more easily form synapses with perisomatic regions of  
169 pyramidal cells and strongly influence the output of neurons (DeFelipe, 2002; Garcia-  
170 Marin et al., 2009). To record sIPSCs on the same neurons, we adjusted the holding  
171 potential to 5 mV, a voltage close to the calculated sEPSCs reverse potential. As  
172 shown in Figure 2G–I, the AD sample significantly increased inter-event intervals

173 (p=6.19E-6, K-S test) and decreased the frequency of sIPSCs (from  $4.7 \pm 0.7$  Hz to  $3.1$   
174  $\pm 0.7$  Hz, p=0.008, n = 7, student t-test), without altering sIPSCs amplitude (from  $14.8 \pm$   
175  $1.4$  pA to  $14.2 \pm 0.9$  pA, p=0.75, n = 7, student t-test). In contrast, the ID-AD sample  
176 had no effect on sIPSCs (frequency: from  $5.3 \pm 0.4$  Hz to  $4.8 \pm 0.7$  Hz, amplitude: from  
177  $13.6 \pm 1.6$  pA to  $13.2 \pm 2.1$  pA, p=0.21, n = 6, student t-test) (Figure 2J-L). These  
178 results revealed that brain-derived A $\beta$  significantly reduces GABAergic input on CA1  
179 pyramidal cells.

180 To assess whether the changes of excitatory input (E) and inhibitory input (I) to the  
181 same neuron affect the E/I balance of that neuron, we calculated the integrated  
182 conductance of sEPSCs and sIPSCs over a 5 min period (Figure 2M). Comparison of  
183 the charge transfer before and 30 min after AD sample application revealed E was  
184 increased ~3 fold and I was decreased ~50%, consequently, the E/I balance was  
185 increased ~6 fold (n=7) (Figure 2N). These results show that AD brain-derived A $\beta$   
186 oppositely affects excitatory and inhibitory synaptic transmission, causing an increase in  
187 the E/I ratio. These changes, especially the reduction of GABAergic tone on individual  
188 neurons, may contribute to neuronal hyperactivity and disturb network homeostasis, and  
189 thus perturb LTP (Wang et al., 2014; Gillespie et al., 2016).

190

191

192

193 **Genetic ablation of APP occludes the effects of A $\beta$  on LTP and pre-synaptic**  
194 **activity and normalizes the E/I balance.**

195 Multiple lines of evidence suggest that the APP may play a role in both GABAergic and  
196 glutamatergic neurotransmission (Bai et al., 2008; Kabogo et al., 2010; Pliassova et al.,  
197 2016; Schwenk et al., 2016) and separate studies impute a link between A $\beta$  and APP  
198 (Lorenzo et al., 2000; Fogel et al., 2014; Kirouac et al., 2017). Thus, having found that  
199 brain-derived A $\beta$  acts on pre-synapses and modulates both GABA and glutamate  
200 transmission, we investigated if APP was required for these effects. For this, we  
201 employed mice null for APP (Figure 3A). In agreement with prior reports, brain slices  
202 from APP KO and WT littermate mice exhibited similar levels of basal activity (P=0.19,  
203 One Way ANOVA test) and LTP (Figure 3B-F) (Dawson et al., 2000; Jedlicka et al.,  
204 2012). In both WT and APP KO slices treated with the aCSF-B control, TBS induced  
205 strong potentiation which lasted the whole recording period ( $158.1 \pm 6.3$  % in WT, n =  
206 11, black dots;  $151.2 \pm 8.5$  % in APP KO, n = 9, gray hexagons; F=4.4, p=0.79,  
207 comparison of the last 10 min recording using One Way ANOVA test) (Fig 3C and D).  
208 In agreement with experiments shown in Figure 1, addition of AD extract to WT slices  
209 significantly decreased LTP compared to addition of aCSF-B ( $121.8 \pm 5.4$  % in WT + AD,  
210 red dots, n = 7, F=4.5, p=0.0005, WT Ctr vs. WT + AD, One Way ANOVA test).  
211 However, application of the same extract to slices from APP KO mice had no effect on  
212 LTP, with the level of LTP in APP KOs indistinguishable from that of WT or APP KO  
213 treated with aCSF-B control ( $145.4 \pm 4.2$  % in APP KO + AD, pink upward triangles,  
214 F=4.5, p=0.41, APP KO Ctr vs. APP KO + AD; One Way ANOVA test). Similarly, AD  
215 extract had no effect on short-term facilitation (Figure 3 - figure supplement 1).

216 To assess the generalizability of the rescue of LTP by APP ablation, we tested the  
217 effect of an extract from a second AD brain (AD2) (Figure 3 - figure supplement 2). As  
218 with the AD1 extract (Figure 1), the AD2 extract blocked LTP in slices from WT mice in  
219 an A $\beta$ -dependent fashion ( $161.9 \pm 5.2$  % in WT Ctr, black dots,  $n = 8$ ;  $123 \pm 4.3$  % in  
220 WT + AD2, red diamonds,  $n = 6$ ;  $F=4.8$ ,  $p=0.0001$ , One Way ANOVA test), but had no  
221 effect on LTP elicited from APP KO mice ( $165.4 \pm 5.2$  % in APP KO Ctr, gray hexagons,  
222  $n = 11$ ;  $170.5 \pm 8$  % in APP KO + AD2, pink upward triangles,  $n = 3$ ;  $F=4.8$ ,  $p=0.29$ , One  
223 Way ANOVA test) (Figure 3E and F). These results were confirmed using another APP  
224 KO line (Zheng et al., 1995) and an extract from a third AD brain (AD3) (Figure 3 - figure  
225 supplement 3). Thus, it appears that the well-documented plasticity-disrupting activity  
226 of A $\beta$  extracted from AD brains (Klyubin et al., 2008; Shankar et al., 2008; Barry et al.,  
227 2011; Freir et al., 2011; Klyubin et al., 2012) requires expression of APP.

228 To investigate whether APP is necessary for the effect of A $\beta$  on the E/I balance (Figure  
229 2), we studied the effects of A $\beta$  on sEPSCs and sIPSCs in brains of APP KO and WT  
230 littermate mice (Figure 4). When applied to WT slices, AD extract again increased mean  
231 sEPSC frequency (from  $2.2 \pm 0.1$  Hz to  $3.4 \pm 0.2$  Hz,  $p=0.003$ ,  $n = 5$ , student t-test) and  
232 decreased inter-event intervals ( $p=6.34E-15$ , K-S test), without altering the amplitude of  
233 sEPSCs (mean amplitude:  $17.8 \pm 0.4$  pA vs.  $18 \pm 1.5$  pA,  $p=0.32$ ,  $n = 5$ , student t-test)  
234 (Figure 4A-C); and on the same neuron decreased mean sIPSCs frequency (from  $4.2 \pm$   
235  $0.8$  Hz to  $2.7 \pm 0.4$  Hz,  $p=0.006$ ,  $n = 5$ , student t-test) and increased inter-event intervals  
236 ( $p=9.44E-20$ , K-S test), but not amplitude (mean amplitude from  $20 \pm 3$  pA to  $19.3 \pm 1.3$   
237 pA,  $p=0.34$ ,  $n = 5$ , student t-test) (Figure 4D-F). These results, which were obtained  
238 with WT mice from an entirely different colony as those used in Figure 2, nicely

239 demonstrate the robustness of the A $\beta$  effect (Compare Figure 2 vs. Figure 4). Most  
240 importantly, when the AD extract was applied to APP KO slices there was no change in  
241 the frequency or amplitude of sEPSCs (mean frequency: from  $2.6 \pm 0.1$  Hz to  $2.7 \pm 0.4$   
242 Hz, mean amplitude: from  $15 \pm 1.4$  pA to  $14.6 \pm 0.5$  pA,  $p=0.14$ , K-S test;  $p=0.26$ ,  $n = 6$ ,  
243 student t-test) (Figure 4G-I). Similarly, sIPSCs were also unchanged (mean frequency:  
244 from  $3.5 \pm 0.5$  Hz to  $3.5 \pm 0.3$  Hz, mean amplitude: from  $16.7 \pm 1$  pA to  $16.4 \pm 1.6$  pA,  
245  $p=0.58$ , K-S test;  $p=0.25$ ,  $n = 6$ , student t-test) (Figure J-L). Thus, as with our LTP  
246 experiments (Figure 3), ablation of APP completely rescued the effects of A $\beta$  on  
247 excitatory and inhibitory input on CA1 pyramidal neurons. Further, since APP KO  
248 occluded A $\beta$  alterations on the E and I input at individual neurons, it also prevented A $\beta$ -  
249 mediated changes in the integrated conductance of sEPSCs and sIPSCs (Figure 4M).  
250 When AD extract was applied to WT slices, E increased ~3-fold and I decreased ~44%,  
251 resulting in ~5.8-fold increase in the E/I ratio. However APP KO significantly reversed  
252 those E/I ratio changes ( $p=0.001$ , E/I in WT vs. E/I in APP KO, One Way ANOVA test)  
253 (Figure 4M). These results indicate that APP plays an important role in regulating the  
254 acute effects of A $\beta$  on excitatory and inhibitory pre-synaptic release, and consequent  
255 maintenance of network homeostasis.

256

### 257 **A $\beta$ binding to synapses requires APP.**

258 To further investigate the targeting of synaptic elements by A $\beta$  and how this might be  
259 influenced by APP we used a powerful high resolution microscopic technique, array  
260 tomography (AT), to search for evidence of A $\beta$  binding to synapses in the same brain

261 slices used in our electrophysiology experiments. Upon completion of LTP recording,  
262 certain slices from the treatment groups used in Figs. 3C and E were immediately fixed,  
263 processed and used for AT. Brain slices were stained with 1C22, an antibody that  
264 preferentially recognizes aggregated forms of A $\beta$  (Mably et al., 2015; Pickett et al.,  
265 2016), synapsin-1 (for pre-synapses) and PSD95 (for post synapses). Approximately  
266 7,000 synapses (~3,500 pre-synapses and ~3,500 post-synapses) per slice were  
267 analyzed. AT revealed significant anti-A $\beta$  staining at synapses of slices incubated with  
268 AD1 extract with only background staining in samples incubated with aCSF and ID  
269 controls (Figure 5A-C; Kruskal Wallis test for synapsin-1 ( $\chi^2(4)= 10.844$ ,  $p=0.028$ ),  
270 Kruskal Wallis test for PSD95 ( $\chi^2(4)= 11.583$ ,  $p=0.021$ )). In slices incubated with AD1  
271 extract  $1.27 \pm 0.47\%$  of pre-synapses and  $0.58 \pm 0.19\%$  of post-synapses stained with  
272 1C22, whereas in slices that had been incubated with aCSF, only  $0.0076\% \pm 0.013\%$  of  
273 pre-synapses and  $0.0184\% \pm 0.087\%$  of post-synapses were 1C22 positive (Dunns  
274 post-hoc between AD and control for pre-synapses  $p=0.024$  and for post-synapses  
275  $p=0.010$ ). Slices incubated with extracts immunodepleted of A $\beta$  exhibited similar  
276 background staining with 1C22 as the aCSF control (Figure 5A-C). Thus, the same  
277 treatment with AD1 extract that disrupts synaptic plasticity in an A $\beta$ -dependent fashion  
278 (Figs 1 and 3) also leads to A $\beta$  binding to synapses (Figure 5A-C). Moreover, the  
279 finding that A $\beta$  is present at more pre-synapses than post-synapses (Mann-Whitney U  
280 between AD pre-synapses and AD post-synapses  $U=0$ ,  $p=0.004$ ) is consistent with our  
281 results that suggest a pre-synaptic effect of A $\beta$  (Figure 1E and F).

282 Importantly, when brain slices from APP KO mice were incubated with AD extract, little  
283 or no synaptic 1C22 staining was detected (Figure 5A, B and C). These results are



284 notable since expression of APP was found to be required for A $\beta$ -mediated disruption of  
285 both long-term plasticity (Figure 3) and neurotransmitter release (Figure 4). In sum, our  
286 AT data are completely congruent with the results of our electrophysiological  
287 experiments and indicate that expression of APP is required for the binding and  
288 subsequent plasticity-disrupting effects of A $\beta$ , and that these effects are largely  
289 mediated on the pre-synapse.

290

## 291 **Discussion**

292 To better understand how A $\beta$  disrupts synaptic plasticity we combined the use of the  
293 most disease relevant form of A $\beta$ , A $\beta$  extracted from human AD brain, with  
294 electrophysiological approaches and high-resolution microscopy. Consistent with prior  
295 studies, we show that extracts from the brains of individuals who died with AD block  
296 LTP (Shankar et al., 2008; Barry et al., 2011; Freir et al., 2011; Yang et al., 2017). We  
297 further show that concomitant with the block of LTP there is an increase in presynaptic  
298 release and disruption of E/I balance. In accord with these synaptic effects of A $\beta$ , we  
299 demonstrate that exogenously applied AD brain-derived A $\beta$  binds to synapses, with  
300 more A $\beta$  oligomers detected on pre-synapses than on the post-synapses. Our finding  
301 that treatment with brain-derived A $\beta$  enhances excitatory drive agrees well with studies  
302 which show that aggregated forms of synthetic A $\beta$  increase EPSPs, action potentials,  
303 and membrane depolarizations (Hartley et al., 1999; Minkeviciene et al., 2009;  
304 Kurudenkandy et al., 2014). Our study is unique in that we employed brain-derived A $\beta$ ,  
305 and that the concentration of this material was much lower than the synthetic A $\beta$  used in  
306 prior studies.

307 The apparent paradox that ectopic application of A $\beta$  causes a net increase in excitation,  
308 yet impairs LTP may result because of glutamate spillover and activation of extra- or  
309 perisynaptic NR2B-enriched NMDARs, which play a major role in LTD induction (Li et  
310 al., 2011; Zhang et al., 2016). In such a scenario, synaptic depression may result from  
311 an initial increase in synaptic activation of NMDARs by glutamate, followed by synaptic  
312 NMDAR desensitization, NMDAR/AMPA internalization, and activation of

313 extrasynaptic NMDARs and mGluRs (Hu et al., 2014). However, it is not clear why  
314 ablation of APP could recover such effects.

315 An alternative explanation that accounts for a role for APP in the impairment of post-  
316 synaptic efficacy is that exogenous AD-derived soluble aggregates and endogenously  
317 produced monomer have differential effects. A $\beta$  is known to be released in an activity-  
318 dependent manner (Kamenetz et al., 2003; Cirrito et al., 2005), whereas elevated A $\beta$   
319 levels result in depressed glutamatergic synaptic transmission and glutamate receptor  
320 endocytosis (Kamenetz et al., 2003; Hsieh et al., 2006). Thus, it is plausible that the  
321 increase in glutamate release induced by soluble A $\beta$  aggregates may also lead to an  
322 increase in *de novo* produced A $\beta$  monomer and this in turn may depress post-synaptic  
323 activity. Such a scenario would necessarily require expression of endogenous APP and  
324 explain why ablation of APP can obviate the block of LTP caused by brain-derived  
325 soluble A $\beta$  aggregates. With regard to the protection of LTP upon ablation of APP, it is  
326 important to emphasize the robust nature and generalizability of this phenomenon. We  
327 observed the same protection using two different APP KO mouse lines (Zheng et al.,  
328 1995; Callahan et al., 2017) and extracts from 3 different AD brains. In all cases AD  
329 extracts blocked LTP in an A $\beta$ -dependent manner when applied to wild type mouse  
330 brain slices, but the same AD extracts had no effect on LTP elicited from APP KO slices.  
331 Moreover, the extent of A $\beta$  binding to synapses was similar in two different sources of  
332 wild type mice (Figure 5B and C), and the pattern observed was reminiscent of that  
333 seen in AD brain (Pickett et al., 2016).

334 There is evidence that APP can act as a receptor for A $\beta$  (Melchor and Van Nostrand,  
335 2000; Van Nostrand et al., 2002; Yankner and Lu, 2009; Fogel et al., 2014; Kirouac et

336 al., 2017) and that APP may mediate increased - excitatory drive (Fogel et al., 2014).  
337 Specifically, A $\beta$  was unable to promote aberrant neurotransmitter release in the  
338 absence of APP (Fogel et al., 2014). Our finding that binding of soluble A $\beta$  aggregates  
339 to synapses requires expression of APP is consistent, but not proof, that APP may act  
340 as a receptor for A $\beta$ . In this regard, it is worth noting that APP is known to both regulate  
341 L-type calcium channels in GABAergic neurons, interact with the pore-forming subunit  
342 Cav1.2 (Yang et al., 2009), and is a member of the GABA<sub>B</sub>-R receptor complex  
343 (Schwenk et al., 2016). In addition, there is evidence from proteomic studies which  
344 indicates that APP interacts with more than 30 different proteins including proteins key  
345 to synaptic vesicle turnover (Kohli et al., 2012; Del Prete et al., 2014; Lassek et al.,  
346 2014; Wilhelm et al., 2014), and proteins (such as the prion protein) which are  
347 implicated in binding A $\beta$  (Bai et al., 2008; Lauren et al., 2009). Thus, A $\beta$  could exert an  
348 APP-dependent effect either by directly binding to APP or binding to protein complexes  
349 of which APP is a component and stabilizing member.

350 So far we have considered the effects of A $\beta$  on synapses and a single hippocampal  
351 pathway (the *Schaffer Collateral*), but A $\beta$  is also thought to have network-wide effects  
352 (Palop and Mucke, 2010). For instance, A $\beta$ -induced increases in excitatory network  
353 activity could lead to synaptic depression through homeostatic mechanisms. It is well  
354 established that acute treatment of primary neurons with bicuculline (a GABA<sub>A</sub>  
355 antagonist) increases overall neuronal activity and firing rates (Vertkin et al., 2015).  
356 However, after a couple of days, neuronal activity returns to control levels. By analogy,  
357 it is reasonable that the disruption of E/I balance seen with our acute A $\beta$  treatment may  
358 also cause both short-term local and long-lasting network effects. Given the fact that A $\beta$

359 treatment increases excitatory drive and decreases inhibitory drive, and that GABA-  
360 ergic interneurons express high levels of APP in DG (Wang et al., 2014; Del Turco et al.,  
361 2016) it is tempting to speculate that A $\beta$ -mediated disruption of GABA-ergic  
362 interneurons may play a special role in the cognitive impairment that occurs early in AD  
363 (Gillespie et al., 2016).

364 Considerable data from the study of APP tgs implicate impairment of GABAergic  
365 interneurons as central to the network disturbances evident in these models (Busche  
366 and Konnerth, 2015; Palop and Mucke, 2016). However, the unphysiological  
367 expression of high levels of APP and the concomitant release of A $\beta$  from the expressed  
368 transgene make it difficult to differentiate between effects mediated by A $\beta$  versus APP,  
369 or non-A $\beta$  APP metabolites (Seabrook et al., 1999; Melnikova et al., 2013; Born et al.,  
370 2014; Fowler et al., 2014). Nonetheless, growing evidence suggests that GABAergic  
371 interneurons play a prominent role in homeostatic regulation of hippocampal networks  
372 and there is compelling proteomic and physiological data that link APP and GABA<sub>B1a</sub>-R  
373 (Wang et al., 2014; Gillespie et al., 2016; Schwenk et al., 2016). Consequently further  
374 investigations on how A $\beta$  effects GABA<sub>B</sub>-R expression, GABA<sub>B</sub>-R-APP interactions and  
375 whether GABA<sub>B</sub>-R KOs are resistant to A $\beta$  are merited and may lead to a  
376 pharmacological means to attenuate A $\beta$  synaptotoxicity. Similarly, modulation of APP  
377 expression may also offer therapeutic potential. However, while our results  
378 demonstrate that ablation of APP in brain slices from young (2-3 month) mice protects  
379 against the acute synaptotoxicity of A $\beta$ , widespread knock-out of APP is not  
380 recommended. APP appears to be involved in many physiological processes (Yang et  
381 al., 2009; Muller and Zheng, 2012; Del Prete et al., 2014; Lassek et al., 2014; Wang et

382 al., 2014) and aged APP null mice exhibit hypersensitivity to kainate-induced seizures  
383 (Steinbach et al., 1998), altered exploratory behavior, deficits in spatial memory, and  
384 impairment of LTP (Dawson et al., 1999; Phinney et al., 1999; Seabrook et al., 1999;  
385 Ring et al., 2007). No such deficits have been reported in APP hemizygous mice, thus  
386 it maybe possible to down regulate APP expression so as to maintain normal function,  
387 yet attenuate A $\beta$  synaptotoxicity.

388

## 389 **Materials and Methods**

### 390 **Reagents**

391 All chemicals and reagents were purchased from Sigma-Aldrich unless otherwise noted.  
392 Synthetic A $\beta$ 1–42 was synthesized and purified using reversed-phase HPLC by Dr.  
393 James I. Elliott at the ERI Amyloid laboratory Oxford, CT, USA. Peptide mass and  
394 purity (>99%) were confirmed by reversed-phase HPLC and electrospray/ion trap mass  
395 spectrometry.

396

### 397 **Antibodies**

398 The antibodies used and their source are described in Table 1.

399

### 400 **Preparation of human brain extracts**

401 All human specimens were obtained and used in accordance with the Partner's  
402 Institutional Review Board (Protocol: Walsh BWH 2011). Tissue was from the brains of  
403 individuals (referred to as AD1, AD2 and AD3) who died with AD. AD1 was an 87 years  
404 old man who 9 months prior to death had scored 23 on the MMSE and at postmortem  
405 had pathological changes consistent with mild AD. AD2 was a 65 years old female who  
406 3 years prior to death scored 24 on the MMSE and at postmortem was diagnosed as  
407 having AD. AD3 was a 68 years old female with end-stage AD and fulminant amyloid  
408 and neurofibrillary tangles pathology. Aqueous extracts of brain were prepared by

409 homogenizing cortical tissue in a buffer which we refer to as artificial cerebrospinal fluid  
410 base buffer (aCSF-B) (124 mM NaCl, 2.8 mM KCl, 1.25 mM NaH<sub>2</sub>PO<sub>4</sub>, 26 mM NaHCO<sub>3</sub>,  
411 pH 7.4). aCSF-B is the core buffer used in subsequent electrophysiology experiments.  
412 Whole frozen temporal cortex was left at 4°C until the tissue was sufficiently soft to cut.  
413 Meninges and large blood vessels were removed and gray matter dissected from white  
414 matter. The total amount of gray matter obtained was between 12-14 g. Two gram lots  
415 of tissue were diced using a razor blade and then homogenized in 10 ml of ice-cold  
416 aCSF-B (containing 5 mM Ethylenediaminetetraacetic acid, 1 mM  
417 Ethyleneglycoltetraacetic acid, 5 µg/ml Leupeptin, 5 µg/ml Aprotinin, 2 µg/ml Pepstatin,  
418 120 µg/ml Pefabloc and 5 mM NaF) with 25 strokes of a Dounce homogenizer (Fisher,  
419 Ottawa, Canada). Homogenates from 6, 2 g lots were pooled and centrifuged at  
420 198,000 g and 4°C for 110 min in a SW 41 Ti rotor (Beckman Coulter, Fullerton, CA).  
421 The upper 90% of supernatant was dialyzed (using Slide-A-Lyzer™ G2 Dialysis  
422 Cassettes, 2K MWCO, Fisher Scientific) against fresh aCSF-B to remove bioactive  
423 small molecules and drugs. Dialysis was performed at 4°C against a 100-fold excess of  
424 buffer with buffer changed 3 times over a 36 h period. Thereafter extracts were divided  
425 into 2 parts: 1 portion was immunodepleted (ID) of Aβ by 3 rounds of 12 hour  
426 incubations with the anti-Aβ antibody, AW7, plus Protein A sepharose (PAS) beads at 4  
427 °C (Freir et al., 2011). The second portion was treated in an identical manner, but this  
428 time incubated with pre-immune serum plus PAS beads. Samples were cleared of  
429 beads and 0.5 ml aliquots stored at -80°C until used for biochemical or  
430 electrophysiological experiments. Samples were thawed once and used.  
431



## 432 **Immunoprecipitation/Western blotting (IP/WB) of A $\beta$ in brain extracts**

433 Extracts were first pre-cleared with PAS beads to minimize non-specific interactions in  
434 the subsequent IP. One ml aliquots of extracts were incubated with 15  $\mu$ l PAS beads  
435 for 1 hour at 4°C with gentle shaking. PAS beads were removed by centrifugation  
436 (4000 g for 5 minutes) and the supernatant divided into 0.5 ml aliquots. Each aliquot  
437 was incubated with 10  $\mu$ l of AW7 and 15  $\mu$ l PAS beads overnight at 4°C with gentle  
438 shaking. A $\beta$ -antibody-PAS complexes were collected by centrifugation and washed as  
439 previously described (Shankar et al., 2011). The immunoprecipitated (IP'd) A $\beta$  was  
440 eluted by boiling in 18  $\mu$ l of 1  $\times$  sample buffer (50 mM Tris, 2% w/v SDS, 12% v/v  
441 glycerol with 0.01% phenol red) and electrophoresed on hand poured, 15 well 16%  
442 polyacrylamide tris-tricine gels. Synthetic A $\beta$ 1-42 was run as a loading control and  
443 protein transferred onto 0.2  $\mu$ M nitrocellulose at 400 mA and 4°C for 2 h. Blots were  
444 microwaved in PBS and A $\beta$  detected using the anti-A $\beta$ 40 and anti-A $\beta$ 42 antibodies, 2G3  
445 and 21F12, and bands visualized using a Li-COR Odyssey infrared imaging system (Li-  
446 COR, Lincoln, NE).

447

## 448 **MSD A $\beta$ immunoassays**

449 Samples were analyzed for A $\beta$  content using 2 distinct assay formats: the A $\beta$ x-42 assay  
450 that preferentially detects A $\beta$ 42 monomers and the oAssay that preferentially detects A $\beta$   
451 oligomers and aggregates (Mably et al., 2015; Mc Donald et al., 2015; Yang et al.,  
452 2015). Immunoassays were performed using the Meso Scale Discovery (MSD) platform

453 and reagents from Meso Scale (Rockville, MD). The A $\beta$ x-42 assay uses mAb m266 (3  
454  $\mu$ g/ml) for capture and biotinylated 21F12 (1  $\mu$ g/ml) for detection, and the oAssay uses  
455 mAb 1C22 (3  $\mu$ g/ml) for capture and biotinylated 3D6 (1  $\mu$ g/ml) for detection. Samples,  
456 standards and blanks were loaded in triplicate and analyzed as described previously  
457 (Mc Donald et al., 2015).

458 Since GuHCl effectively disaggregates high molecular weight A $\beta$  species (Mc Donald et  
459 al., 2015), samples were analyzed both with and without incubation in 5 M GuHCl.  
460 Analysis of samples in the absence of GuHCl allows the measurement of native A $\beta$ 42  
461 monomer using the A $\beta$ x-42 assay, and native A $\beta$  aggregates using the oAssay.  
462 Analysis of samples treated with GuHCl allows detection of disassembled aggregates  
463 with A $\beta$ x-42 assay. To dissociate aggregates 20  $\mu$ l of extract was incubated overnight  
464 with 50  $\mu$ l of 7 M GuHCl at 4°C. Thereafter samples were diluted 1:10 with assay  
465 diluent, so that the final GuHCl concentration was 0.5 M. A $\beta$  standards were prepared  
466 in tris-buffered saline (TBS), pH 7.4 containing 0.5 M GuHCl, 0.05% Tween 20 and 1%  
467 Blocker A so that both standards and samples contained the same final concentration of  
468 GuHCl.

469

## 470 **Mice**

471 All animal procedures were performed in accordance with the National Institutes of  
472 Health Policy on the Use of Animals in Research and were approved by the Harvard  
473 Medical School Standing Committee on Animals. Wild type (WT) C57BL/6 mice were

474 purchased from Jackson Labs (Bar Harbor, ME). APP KO mice on a C57BL/6  
475 background and littermate WT controls were obtained from the Young-Pearse lab  
476 (Callahan et al., 2017). A second line of APP KO mice were purchased from the  
477 Jackson Laboratory (APP<sup>tm1<sup>Dbo</sup></sup>/J, The Jackson Laboratory, Bar Harbor, ME) (Zheng et  
478 al., 1995). Animals were housed in a room with a 12 h light/dark circadian cycle with *ad*  
479 *libitum* access to food and water. Mice were genotyped by PCR prior to use, and after  
480 use certain brain slices were used for Western blotting (Figure 3A).

481

#### 482 **Brain slices preparation**

483 Two to three months old male and female animals were anaesthetized with isoflurane  
484 and decapitated. Brains were rapidly removed and immediately immersed in ice-cold  
485 (0-4°C) artificial cerebrospinal fluid (aCSF). The aCSF contained (in mM): 124 NaCl, 3  
486 KCl, 2.4 CaCl<sub>2</sub>, 2 MgSO<sub>4</sub>·7H<sub>2</sub>O, 1.25 NaH<sub>2</sub>PO<sub>4</sub>, 26 NaHCO<sub>3</sub> and 10 D-glucose, and was  
487 equilibrated with 95% O<sub>2</sub> and 5% CO<sub>2</sub>, pH 7.4, 310 mOsm. Coronal brain slices (350  
488 µm) including hippocampus (Wang et al., 2008) were prepared using a Leica VT1000 S  
489 vibratome (Leica Biosystems Inc, Buffalo Grove, IL) and transferred to an interface  
490 chamber and incubated at 34 ± 5°C for 20 min and then kept at room temperature for 1  
491 h before recording.

492

#### 493 **Long-term potentiation (LTP) recording**

494 Brain slices were transferred to a submerged recording chamber and perfused (10  
495 ml/min) with oxygenated (95% O<sub>2</sub> and 5% CO<sub>2</sub>) aCSF 10 min before

496 electrophysiological recording. Brain slices were visualized using an infrared and  
497 differential interference contrast camera (IR-DIC camera, Hitachi, Japan) mounted on  
498 an upright Olympus microscope (Olympus, Tokyo, Japan). Recording electrodes were  
499 pulled from borosilicate glass capillaries (Sutter Instruments, Novato, CA) using a  
500 micropipette puller (Model P-97; Sutter Instruments, Novato, CA) with resistance  $\sim 2$  M $\Omega$   
501 when filled with ACSF. To induce field excitatory post-synaptic potential (fEPSP) in the  
502 hippocampal CA1, a tungsten wire stimulating electrode (FHC, Inc., Bowdoin, ME) was  
503 placed on the Schaffer collaterals of the CA3 and a recording electrode was placed at  
504 least 300  $\mu$ M away on the striatum radiatum of the CA1. Test stimuli were delivered  
505 once every 20 s (0.05 Hz) and the stimulus intensity was adjusted to produce a baseline  
506 fEPSP of 30–40% of the maximal response. A stable baseline was recorded for at least  
507 10 min prior to addition of sample. Thirty minutes following application of sample LTP  
508 was induced by theta burst stimulation (TBS, involved 3 trains, each of 4 pulses  
509 delivered at 100 Hz, 10 times, with an interburst interval of 200 ms with a 20 sec interval  
510 between each train). Field potentials were recorded using a Multiclamp amplifier  
511 (Multiclamp 700B; Molecular Devices, Sunnyvale, CA) coupled to a Digidata 1440A  
512 digitizer. Signal was sampled at 10 kHz and filtered at 2 kHz and data were analyzed  
513 using Clampex 10 software (Molecular Devices, Sunnyvale, CA).

514

### 515 **Whole-cell patch clamp recording**

516 Brain slices were prepared from male and female WT and APP KO mice (1-2 months  
517 old) as described above for LTP experiments but using a different cutting solution  
518 contained sucrose (in mM: 72 sucrose, 83 NaCl, 2.5 KCl, 1 NaH<sub>2</sub>PO<sub>4</sub>, 3.3

519 MgSO<sub>4</sub>·7H<sub>2</sub>O, 26.2 NaHCO<sub>3</sub>, 22 dextrose, and 0.5 CaCl<sub>2</sub>) saturated with 95% O<sub>2</sub> and 5%  
520 CO<sub>2</sub>, pH 7.4, 310 mOsm (Wang et al., 2015). Slices were incubated in oxygenated  
521 slicing solution for 20 min, and held at room temperature for a further 40 min prior to  
522 recording. Slices were transferred to a submerged recording chamber and perfused (10  
523 ml/min) with oxygenated (95% O<sub>2</sub> and 5% CO<sub>2</sub>) aCSF for 30 min at room temperature.  
524 Whole-cell recordings were made from the somata of CA1 pyramidal neurons visualized  
525 using an IR-DIC camera mounted on an upright Olympus microscope (Olympus, Tokyo,  
526 Japan). Patch pipettes (4–7MΩ) were filled with an internal solution containing (in mM):  
527 120 CsGluconate, 5 MgCl<sub>2</sub>, 0.6 EGTA, 30 HEPES, 4 MgATP, 0.4 Na<sub>2</sub>GTP, 10  
528 phosphocreatine-Tris, 5 QX-314; 290 mOsm; pH was adjusted at 7.2 with CsOH. Signal  
529 was acquired using a Multiclamp amplifier (Multiclamp 700B; Molecular Devices,  
530 Sunnyvale, CA) with Clampex 10 software (Molecular Devices, Sunnyvale, CA) and  
531 sampled at 10 kHz and filtered at 2 kHz. Data were stored on a PC after digitization by  
532 an A/D converter (Digidata 1440A, Molecular Devices, Sunnyvale, CA) for offline  
533 analysis. Membrane potential was corrected for the liquid junction potential of 13.7 mV.  
534 Neurons with negative resting membrane potential less than -60 mV were not analyzed.  
535 Input resistance and patching access resistance were continuously monitored during  
536 the experiment and cells which exhibited more than 15–20% changes in these  
537 parameters were excluded from analysis.

538 In order to preserve a relatively intact neuronal circuit no receptor antagonists were  
539 used. Spontaneous excitatory post-synaptic currents (sEPSCs) were collected at a  
540 membrane holding potential of -70 mV, which is close to the calculated reverse potential  
541 of GABA. In order to measure the excitatory and inhibitory input on the same neuron,

542 the spontaneous inhibitory post-synaptic currents (sIPSCs) were also measured on the  
543 same neuron but this time the holding potential was increased to 5-10 mV, a potential  
544 close to the reverse potential of excitatory input, without visual negative deflection.  
545 Recorded neuronal activities were detected as described previously (Lillis et al., 2015)  
546 by custom software (DClamp: available at [www.ieeg.org/?q=node/34](http://www.ieeg.org/?q=node/34)). Integrated  
547 excitatory conductance (sEPSCs,  $G_E$ ) and integrated inhibitory conductance (sIPSCs,  
548  $G_I$ ) were calculated as previously reported  $G_E = \int_0^t \frac{sEPSCs}{t(V_M - V_{Erev})}$  and  $G_I = \int_0^t \frac{sIPSCs}{t(V_M - V_{Irev})}$   
549 (Slomowitz et al., 2015).

550

### 551 **Preparation of mouse brain homogenates and detection of APP**

552 Certain brain slices from wild-type and APP knock-out mice were frozen immediately  
553 after completion of electrophysiological recording (Figs 3 and 4) and stored at -80°C  
554 until analyzed. Tissue (~0.1 mg) was homogenized in 5 volumes (w/v) of ice-cold 20  
555 mM TBS-TX, pH 7.4 containing protease inhibitors and centrifuged at 100,000 g and  
556 4°C for 78 minutes in a TLA-55 rotor (Beckman Coulter, Fullerton, CA). The upper 90%  
557 of the supernatant was removed, aliquoted and stored at -80°C pending analysis. Ten  
558 µg of total protein was boiled in 1 × sample buffer (62.5 mM Tris, 1% w/v SDS, 10% v/v  
559 glycerol, 0.01% phenol red and 2% β-mercaptoethanol) for 5 min and then  
560 electrophoresed on hand poured, 15 well 10% polyacrylamide tris-glycine gels. Gels  
561 were rinsed in transfer buffer (10% methanol, 192 mM Glycine and 25 mM Tris) and  
562 proteins electroblotted onto 0.2 µM nitrocellulose membranes at 400 mA and 4°C for 2.5

563 h. Membranes were developed using the anti-APP antibody, 22C11, and bands  
564 visualized using a LI-COR Odyssey infrared imaging system (LI-COR, Lincoln, NE).

565

### 566 **Array tomography (AT) imaging of mouse brain slices**

567 Upon completion of electrophysiology recordings certain brain slices from wild-type and  
568 APP knock mice (Figs 3 and 4) were processed for array tomography (Koffie et al.,  
569 2009; Pickett et al., 2016). Slices were fixed in PBS containing 4% paraformaldehyde  
570 and 2.5% sucrose at 4°C overnight. Samples were then washed three times (10 min  
571 each) in cold wash buffer (PBS containing 3.5% sucrose and 50 mM glycine), and the  
572 hippocampus dissected out under a Leica Wild M3Z Stereozoom Microscope  
573 (Heerbrugg, Switzerland). Thereafter hippocampi were dehydrated using an ethanol  
574 series of: 50%, 70%, 95% and 100%. Tissue was then placed into a solution of 1:1  
575 ethanol: LR White resin (Electron Microscopy Sciences) for 5 min and then washed 3  
576 times with LR white. Tissue was incubated overnight at 4°C in LR white and then  
577 embedded in a gelatin capsule and polymerized overnight at 53°C. Three embedded  
578 blocks per condition were cut into ribbons of 70 nm sections on an ultracut microtome  
579 (Leica) using a Jumbo Histo Diamond Knife (Diatome). Ribbons were collected on  
580 gelatin-coated glass coverslips, stained with antibodies and imaged along the ribbon.  
581 Two ribbons per slice were collected and one was stained for PSD95 and 1C22 and the  
582 other for synapsin-1 and 1C22. Primary antibodies were 1C22 (1:50), rabbit anti-  
583 PSD95 (3450P, Cell Signaling, at 1:5), and rabbit anti-synapsin-1 (AB1543P, Millipore,

584 at 1:100). Secondary antibodies donkey anti-mouse 488 (A21202) and donkey anti-  
585 rabbit 594 (A21207) were from Invitrogen and used at 1:50.

586 Two image stacks per ribbon were collected from the stratum radiatum using a Zeiss  
587 axio Imager Z2 epifluorescent microscope with a 63X 1.4NA Plan Apochromat objective.  
588 Images were acquired with a CoolSnap digital camera and Axiolmager software with  
589 array tomography macros (Carl Zeiss, Ltd, Cambridge UK). Images from each set of  
590 serial sections were compiled to create a 3D stack and aligned using ImageJ  
591 multistackreg macros (Kay et al., 2013). Regions of interest (10  $\mu\text{m}$  x 10  $\mu\text{m}$ ) were  
592 selected, cropped and thresholded in Image J (Schindelin et al., 2012; Ollion et al.,  
593 2013). Custom MatLab macros were used to remove single slice punctuate, count  
594 synaptic punctuate and assess co-localization with 1C22 (a minimum of 50% overlap  
595 between 1C22 and synaptic punctuate was required to be designated as co-localization).  
596 All custom analysis macros will be freely available on <http://datashare.is.ed.ac.uk> after  
597 publication.

598

### 599 **Data analysis and Statistics test**

600 IP/WB and MSD A $\beta$  immunoassay is representative of at least 2 experiments. For  
601 electrophysiological experiments, the AD, ID-AD and aCSF samples were coded and  
602 tested in an interleaved manner to avoid variances in animals or slice quality influencing  
603 on results. There was no outliers were excluded from the analysis. Electrophysiological  
604 data were analyzed offline by pclamp 10.2 (Molecular Devices, Sunnyvale, CA) and  
605 tested with One-way or Two-way analysis of variance (ANOVA) with Bonferroni post-



606 hoc tests or student t-tests (#  $P < 0.05$ , ##  $P < 0.01$ , and ###  $P < 0.001$ ). A Kolmogorov–  
607 Smirnov (K–S) test was used to compute differences in distributions of sEPSCs and  
608 sIPSCs. Array tomography was analyzed using SPSS Version 22. A single percent co-  
609 localization for each parameter was calculated for each slice from approximately 41  
610 regions of interest and  $\approx 7500$  synapses ( $\sim 3,500$  pre-synapses and  $\sim 3,500$  post-  
611 synapses) were analyzed per slice and tested with a Kruskal-Wallis with Dunns post-  
612 hoc test and Mann-Whitney U test. Electrophysiology data are shown as means  $\pm$  SEM.  
613 Array tomography data is shown as medians  $\pm$  the interquartile range, each point  
614 representing all synapses measured within 1 slice. Analyses of the same sample using  
615 different slices are considered technical replicates and analysis of extracts from different  
616 AD brains are considered biological replicates.

## References

- Abramov E, Dolev I, Fogel H, Ciccotosto GD, Ruff E, Slutsky I (2009) Amyloid-beta as a positive endogenous regulator of release probability at hippocampal synapses. *Nature neuroscience* 12:1567-1576.
- Ashe KH, Zahs KR (2010) Probing the biology of Alzheimer's disease in mice. *Neuron* 66:631-645.
- Bai Y, Markham K, Chen F, Weerasekera R, Watts J, Horne P, Wakutani Y, Bagshaw R, Mathews PM, Fraser PE, Westaway D, St George-Hyslop P, Schmitt-Ulms G (2008) The in vivo brain interactome of the amyloid precursor protein. *Molecular & cellular proteomics : MCP* 7:15-34.
- Barry AE, Klyubin I, Mc Donald JM, Mably AJ, Farrell MA, Scott M, Walsh DM, Rowan MJ (2011) Alzheimer's disease brain-derived amyloid-beta-mediated inhibition of LTP in vivo is prevented by immunotargeting cellular prion protein. *The Journal of neuroscience : the official journal of the Society for Neuroscience* 31:7259-7263.
- Borlikova GG, Trejo M, Mably AJ, Mc Donald JM, Sala Frigerio C, Regan CM, Murphy KJ, Masliah E, Walsh DM (2013) Alzheimer brain-derived amyloid beta-protein impairs synaptic remodeling and memory consolidation. *Neurobiology of aging* 34:1315-1327.
- Born HA, Kim JY, Savjani RR, Das P, Dabaghian YA, Guo Q, Yoo JW, Schuler DR, Cirrito JR, Zheng H, Golde TE, Noebels JL, Jankowsky JL (2014) Genetic suppression of transgenic APP rescues Hypersynchronous network activity in a mouse model of Alzheimer's disease. *The Journal of neuroscience : the official journal of the Society for Neuroscience* 34:3826-3840.
- Busche MA, Konnerth A (2015) Neuronal hyperactivity--A key defect in Alzheimer's disease? *BioEssays : news and reviews in molecular, cellular and developmental biology* 37:624-632.
- Callahan DG, Taylor WM, Tilearcio M, Cavanaugh T, Selkoe DJ, Young-Pearse TL (2017) Embryonic mosaic deletion of APP results in displaced Reelin-expressing cells in the cerebral cortex. *Developmental biology* 424:138-146.
- Cirrito JR, Yamada KA, Finn MB, Sloviter RS, Bales KR, May PC, Schoepp DD, Paul SM, Mennerick S, Holtzman DM (2005) Synaptic activity regulates interstitial fluid amyloid-beta levels in vivo. *Neuron* 48:913-922.
- Cleary JP, Walsh DM, Hofmeister JJ, Shankar GM, Kuskowski MA, Selkoe DJ, Ashe KH (2005) Natural oligomers of the amyloid-beta protein specifically disrupt cognitive function. *Nature neuroscience* 8:79-84.
- Conboy L, Murphy KJ, Regan CM (2005) Amyloid precursor protein expression in the rat hippocampal dentate gyrus modulates during memory consolidation. *Journal of neurochemistry* 95:1677-1688.
- Dawson GR, Seabrook GR, Zheng H, Smith DW, Graham S, O'Dowd G, Bowery BJ, Boyce S, Trumbauer ME, Chen HY, Van der Ploeg LH, Sirinathsinghji DJ (1999) Age-related cognitive deficits, impaired long-term potentiation and reduction in synaptic marker density in mice lacking the beta-amyloid precursor protein. *Neuroscience* 90:1-13.
- De Strooper B (2010) Proteases and proteolysis in Alzheimer disease: a multifactorial view on the disease process. *Physiological reviews* 90:465-494.
- DeFelipe J (2002) Cortical interneurons: from Cajal to 2001. *Progress in brain research* 136:215-238.
- Del Prete D, Lombino F, Liu X, D'Adamio L (2014) APP is cleaved by Bace1 in pre-synaptic vesicles and establishes a pre-synaptic interactome, via its intracellular domain, with molecular complexes that regulate pre-synaptic vesicles functions. *PLoS one* 9:e108576.

- Del Turco D, Paul MH, Schlaudraff J, Hick M, Endres K, Muller UC, Deller T (2016) Region-Specific Differences in Amyloid Precursor Protein Expression in the Mouse Hippocampus. *Frontiers in molecular neuroscience* 9:134.
- Doyle E, Bruce MT, Breen KC, Smith DC, Anderton B, Regan CM (1990) Intraventricular infusions of antibodies to amyloid-beta-protein precursor impair the acquisition of a passive avoidance response in the rat. *Neuroscience letters* 115:97-102.
- Esch FS, Keim PS, Beattie EC, Blacher RW, Culwell AR, Oltersdorf T, McClure D, Ward PJ (1990) Cleavage of amyloid beta peptide during constitutive processing of its precursor. *Science* 248:1122-1124.
- Fanutza T, Del Prete D, Ford MJ, Castillo PE, D'Adamio L (2015) APP and APLP2 interact with the synaptic release machinery and facilitate transmitter release at hippocampal synapses. *eLife* 4:e09743.
- Fogel H, Frere S, Segev O, Bharill S, Shapira I, Gazit N, O'Malley T, Slomowitz E, Berdichevsky Y, Walsh DM, Isacoff EY, Hirsch JA, Slutsky I (2014) APP homodimers transduce an amyloid-beta-mediated increase in release probability at excitatory synapses. *Cell reports* 7:1560-1576.
- Fowler SW, Chiang AC, Savjani RR, Larson ME, Sherman MA, Schuler DR, Cirrito JR, Lesne SE, Jankowsky JL (2014) Genetic modulation of soluble A $\beta$  rescues cognitive and synaptic impairment in a mouse model of Alzheimer's disease. *The Journal of neuroscience : the official journal of the Society for Neuroscience* 34:7871-7885.
- Freir DB, Nicoll AJ, Klyubin I, Panico S, Mc Donald JM, Risse E, Asante EA, Farrow MA, Sessions RB, Saibil HR, Clarke AR, Rowan MJ, Walsh DM, Collinge J (2011) Interaction between prion protein and toxic amyloid beta assemblies can be therapeutically targeted at multiple sites. *Nature communications* 2:336.
- Garcia-Marin V, Blazquez-Llorca L, Rodriguez JR, Boluda S, Muntane G, Ferrer I, Defelipe J (2009) Diminished perisomatic GABAergic terminals on cortical neurons adjacent to amyloid plaques. *Frontiers in neuroanatomy* 3:28.
- Gillespie AK, Jones EA, Lin YH, Karlsson MP, Kay K, Yoon SY, Tong LM, Nova P, Carr JS, Frank LM, Huang Y (2016) Apolipoprotein E4 Causes Age-Dependent Disruption of Slow Gamma Oscillations during Hippocampal Sharp-Wave Ripples. *Neuron* 90:740-751.
- Golde TE, Estus S, Younkin LH, Selkoe DJ, Younkin SG (1992) Processing of the amyloid protein precursor to potentially amyloidogenic derivatives. *Science* 255:728-730.
- Guerreiro R, Hardy J (2014) Genetics of Alzheimer's disease. *Neurotherapeutics : the journal of the American Society for Experimental NeuroTherapeutics* 11:732-737.
- Haass C, Schlossmacher MG, Hung AY, Vigo-Pelfrey C, Mellon A, Ostaszewski BL, Lieberburg I, Koo EH, Schenk D, Teplow DB, et al. (1992) Amyloid beta-peptide is produced by cultured cells during normal metabolism. *Nature* 359:322-325.
- Hartley DM, Walsh DM, Ye CP, Diehl T, Vasquez S, Vassilev PM, Teplow DB, Selkoe DJ (1999) Protofibrillar intermediates of amyloid beta-protein induce acute electrophysiological changes and progressive neurotoxicity in cortical neurons. *The Journal of neuroscience : the official journal of the Society for Neuroscience* 19:8876-8884.
- Hsieh H, Boehm J, Sato C, Iwatsubo T, Tomita T, Sisodia S, Malinow R (2006) AMPAR removal underlies A $\beta$ -induced synaptic depression and dendritic spine loss. *Neuron* 52:831-843.
- Hu NW, Nicoll AJ, Zhang D, Mably AJ, O'Malley T, Purro SA, Terry C, Collinge J, Walsh DM, Rowan MJ (2014) mGlu5 receptors and cellular prion protein mediate amyloid-beta-facilitated synaptic long-term depression in vivo. *Nature communications* 5:3374.
- Huang JK, Ma PL, Ji SY, Zhao XL, Tan JX, Sun XJ, Huang FD (2013) Age-dependent alterations in the presynaptic active zone in a *Drosophila* model of Alzheimer's disease. *Neurobiology of disease* 51:161-167.

- Huber G, Martin JR, Loffler J, Moreau JL (1993) Involvement of amyloid precursor protein in memory formation in the rat: an indirect antibody approach. *Brain research* 603:348-352.
- Johnson KA, Fox NC, Sperling RA, Klunk WE (2012) Brain imaging in Alzheimer disease. *Cold Spring Harbor perspectives in medicine* 2:a006213.
- Kabogo D, Rauw G, Amritraj A, Baker G, Kar S (2010) ss-amyloid-related peptides potentiate K<sup>+</sup>-evoked glutamate release from adult rat hippocampal slices. *Neurobiology of aging* 31:1164-1172.
- Kamenetz F, Tomita T, Hsieh H, Seabrook G, Borchelt D, Iwatsubo T, Sisodia S, Malinow R (2003) APP processing and synaptic function. *Neuron* 37:925-937.
- Kay KR, Smith C, Wright AK, Serrano-Pozo A, Pooler AM, Koffie R, Bastin ME, Bak TH, Abrahams S, Kopeikina KJ, McGuone D, Frosch MP, Gillingwater TH, Hyman BT, Spires-Jones TL (2013) Studying synapses in human brain with array tomography and electron microscopy. *Nature protocols* 8:1366-1380.
- Kim J, Chakrabarty P, Hanna A, March A, Dickson DW, Borchelt DR, Golde T, Janus C (2013) Normal cognition in transgenic B $\beta$ 12-A $\beta$  mice. *Molecular neurodegeneration* 8:15.
- Kirouac L, Rajic AJ, Cribbs DH, Padmanabhan J (2017) Activation of Ras-ERK Signaling and GSK-3 by Amyloid Precursor Protein and Amyloid Beta Facilitates Neurodegeneration in Alzheimer's Disease. *eNeuro* 4.
- Klyubin I, Cullen WK, Hu NW, Rowan MJ (2012) Alzheimer's disease A $\beta$  assemblies mediating rapid disruption of synaptic plasticity and memory. *Molecular brain* 5:25.
- Klyubin I, Betts V, Welzel AT, Blennow K, Zetterberg H, Wallin A, Lemere CA, Cullen WK, Peng Y, Wisniewski T, Selkoe DJ, Anwyl R, Walsh DM, Rowan MJ (2008) Amyloid beta protein dimer-containing human CSF disrupts synaptic plasticity: prevention by systemic passive immunization. *The Journal of neuroscience : the official journal of the Society for Neuroscience* 28:4231-4237.
- Koffie RM, Meyer-Luehmann M, Hashimoto T, Adams KW, Mielke ML, Garcia-Alloza M, Micheva KD, Smith SJ, Kim ML, Lee VM, Hyman BT, Spires-Jones TL (2009) Oligomeric amyloid beta associates with postsynaptic densities and correlates with excitatory synapse loss near senile plaques. *Proceedings of the National Academy of Sciences of the United States of America* 106:4012-4017.
- Kohli BM, Pflieger D, Mueller LN, Carbonetti G, Aebersold R, Nitsch RM, Konietzko U (2012) Interactome of the amyloid precursor protein APP in brain reveals a protein network involved in synaptic vesicle turnover and a close association with Synaptotagmin-1. *Journal of proteome research* 11:4075-4090.
- Kurudenkandy FR, Zilberter M, Biverstal H, Presto J, Honcharenko D, Stromberg R, Johansson J, Winblad B, Fisahn A (2014) Amyloid-beta-induced action potential desynchronization and degradation of hippocampal gamma oscillations is prevented by interference with peptide conformation change and aggregation. *The Journal of neuroscience : the official journal of the Society for Neuroscience* 34:11416-11425.
- Lambert MP, Barlow AK, Chromy BA, Edwards C, Freed R, Liosatos M, Morgan TE, Rozovsky I, Trommer B, Viola KL, Wals P, Zhang C, Finch CE, Krafft GA, Klein WL (1998) Diffusible, nonfibrillar ligands derived from A $\beta$ 1-42 are potent central nervous system neurotoxins. *Proceedings of the National Academy of Sciences of the United States of America* 95:6448-6453.
- Lassek M, Weingarten J, Einsfelder U, Brendel P, Muller U, Volkandt W (2013) Amyloid precursor proteins are constituents of the presynaptic active zone. *Journal of neurochemistry* 127:48-56.
- Lassek M, Weingarten J, Acker-Palmer A, Bajjalieh SM, Muller U, Volkandt W (2014) Amyloid precursor protein knockout diminishes synaptic vesicle proteins at the presynaptic active zone in mouse brain. *Current Alzheimer research* 11:971-980.

- Lassek M, Weingarten J, Wegner M, Mueller BF, Rohmer M, Baeumlisberger D, Arrey TN, Hick M, Ackermann J, Acker-Palmer A, Koch I, Muller U, Karas M, Volkandt W (2016) APP Is a Context-Sensitive Regulator of the Hippocampal Presynaptic Active Zone. *PLoS computational biology* 12:e1004832.
- Lauren J, Gimbel DA, Nygaard HB, Gilbert JW, Strittmatter SM (2009) Cellular prion protein mediates impairment of synaptic plasticity by amyloid-beta oligomers. *Nature* 457:1128-1132.
- Li S, Hong S, Shepardson NE, Walsh DM, Shankar GM, Selkoe D (2009) Soluble oligomers of amyloid Beta protein facilitate hippocampal long-term depression by disrupting neuronal glutamate uptake. *Neuron* 62:788-801.
- Li S, Jin M, Koeglsperger T, Shepardson NE, Shankar GM, Selkoe DJ (2011) Soluble Abeta oligomers inhibit long-term potentiation through a mechanism involving excessive activation of extrasynaptic NR2B-containing NMDA receptors. *The Journal of neuroscience : the official journal of the Society for Neuroscience* 31:6627-6638.
- Lillis KP, Wang Z, Mail M, Zhao GQ, Berdichevsky Y, Bacskai B, Staley KJ (2015) Evolution of Network Synchronization during Early Epileptogenesis Parallels Synaptic Circuit Alterations. *The Journal of neuroscience : the official journal of the Society for Neuroscience* 35:9920-9934.
- Lorenzo A, Yuan M, Zhang Z, Paganetti PA, Sturchler-Pierrat C, Staufenbiel M, Mautino J, Vigo FS, Sommer B, Yankner BA (2000) Amyloid beta interacts with the amyloid precursor protein: a potential toxic mechanism in Alzheimer's disease. *Nature neuroscience* 3:460-464.
- Mably AJ, Kanmert D, Mc Donald JM, Liu W, Caldarone BJ, Lemere CA, O'Nuallain B, Kosik KS, Walsh DM (2015) Tau immunization: a cautionary tale? *Neurobiology of aging* 36:1316-1332.
- Mc Donald JM, O'Malley TT, Liu W, Mably AJ, Brinkmalm G, Portelius E, Wittbold WM, 3rd, Frosch MP, Walsh DM (2015) The aqueous phase of Alzheimer's disease brain contains assemblies built from approximately 4 and approximately 7 kDa Abeta species. *Alzheimer's & dementia : the journal of the Alzheimer's Association* 11:1286-1305.
- Melchor JP, Van Nostrand WE (2000) Fibrillar amyloid beta-protein mediates the pathologic accumulation of its secreted precursor in human cerebrovascular smooth muscle cells. *The Journal of biological chemistry* 275:9782-9791.
- Melnikova T, Fromholt S, Kim H, Lee D, Xu G, Price A, Moore BD, Golde TE, Felsenstein KM, Savonenko A, Borchelt DR (2013) Reversible pathologic and cognitive phenotypes in an inducible model of Alzheimer-amyloidosis. *The Journal of neuroscience : the official journal of the Society for Neuroscience* 33:3765-3779.
- Mileusnic R, Lancashire CL, Johnston AN, Rose SP (2000) APP is required during an early phase of memory formation. *The European journal of neuroscience* 12:4487-4495.
- Minkeviciene R, Rheims S, Dobszay MB, Zilberter M, Hartikainen J, Fulop L, Penke B, Zilberter Y, Harkany T, Pitkanen A, Tanila H (2009) Amyloid beta-induced neuronal hyperexcitability triggers progressive epilepsy. *The Journal of neuroscience : the official journal of the Society for Neuroscience* 29:3453-3462.
- Mockett BG, Richter M, Abraham WC, Muller UC (2017) Therapeutic Potential of Secreted Amyloid Precursor Protein APPsalpha. *Frontiers in molecular neuroscience* 10:30.
- Muller UC, Zheng H (2012) Physiological functions of APP family proteins. *Cold Spring Harbor perspectives in medicine* 2:a006288.
- Neve RL, McPhie DL (2007) Dysfunction of amyloid precursor protein signaling in neurons leads to DNA synthesis and apoptosis. *Biochimica et biophysica acta* 1772:430-437.
- Nilsson P, Saito T, Saido TC (2014) New mouse model of Alzheimer's. *ACS chemical neuroscience* 5:499-502.

- Nimmrich V, Grimm C, Draguhn A, Barghorn S, Lehmann A, Schoemaker H, Hillen H, Gross G, Ebert U, Bruehl C (2008) Amyloid beta oligomers (A beta(1-42) globulomer) suppress spontaneous synaptic activity by inhibition of P/Q-type calcium currents. *The Journal of neuroscience : the official journal of the Society for Neuroscience* 28:788-797.
- Ollion J, Cochenec J, Loll F, Escude C, Boudier T (2013) TANGO: a generic tool for high-throughput 3D image analysis for studying nuclear organization. *Bioinformatics* 29:1840-1841.
- Palop JJ, Mucke L (2009) Epilepsy and cognitive impairments in Alzheimer disease. *Archives of neurology* 66:435-440.
- Palop JJ, Mucke L (2010) Amyloid-beta-induced neuronal dysfunction in Alzheimer's disease: from synapses toward neural networks. *Nature neuroscience* 13:812-818.
- Palop JJ, Mucke L (2016) Network abnormalities and interneuron dysfunction in Alzheimer disease. *Nature reviews Neuroscience* 17:777-792.
- Parodi J, Sepulveda FJ, Roa J, Opazo C, Inestrosa NC, Aguayo LG (2010) Beta-amyloid causes depletion of synaptic vesicles leading to neurotransmission failure. *The Journal of biological chemistry* 285:2506-2514.
- Phinney AL, Deller T, Stalder M, Calhoun ME, Frotscher M, Sommer B, Staufenbiel M, Jucker M (1999) Cerebral amyloid induces aberrant axonal sprouting and ectopic terminal formation in amyloid precursor protein transgenic mice. *The Journal of neuroscience : the official journal of the Society for Neuroscience* 19:8552-8559.
- Pickett EK, Koffie RM, Wegmann S, Henstridge CM, Herrmann AG, Colom-Cadena M, Lleo A, Kay KR, Vaught M, Soberman R, Walsh DM, Hyman BT, Spires-Jones TL (2016) Non-Fibrillar Oligomeric Amyloid-beta within Synapses. *Journal of Alzheimer's disease : JAD* 53:787-800.
- Pliassova A, Lopes JP, Lemos C, Oliveira CR, Cunha RA, Agostinho P (2016) The Association of Amyloid-beta Protein Precursor With alpha- and beta-Secretases in Mouse Cerebral Cortex Synapses Is Altered in Early Alzheimer's Disease. *Molecular neurobiology* 53:5710-5721.
- Portelius E, Olsson M, Brinkmalm G, Ruetschi U, Mattsson N, Andreasson U, Gobom J, Brinkmalm A, Holtta M, Blennow K, Zetterberg H (2013) Mass spectrometric characterization of amyloid-beta species in the 7PA2 cell model of Alzheimer's disease. *Journal of Alzheimer's disease : JAD* 33:85-93.
- Ring S, Weyer SW, Kilian SB, Waldron E, Pietrzik CU, Filippov MA, Herms J, Buchholz C, Eckman CB, Korte M, Wolfner DP, Muller UC (2007) The secreted beta-amyloid precursor protein ectodomain APPs alpha is sufficient to rescue the anatomical, behavioral, and electrophysiological abnormalities of APP-deficient mice. *The Journal of neuroscience : the official journal of the Society for Neuroscience* 27:7817-7826.
- Ripoli C, Piacentini R, Riccardi E, Leone L, Li Puma DD, Bitan G, Grassi C (2013) Effects of different amyloid beta-protein analogues on synaptic function. *Neurobiology of aging* 34:1032-1044.
- Russell CL, Semerdjieva S, Empson RM, Austen BM, Beesley PW, Alifragis P (2012) Amyloid-beta acts as a regulator of neurotransmitter release disrupting the interaction between synaptophysin and VAMP2. *PloS one* 7:e43201.
- Scheff SW, Price DA, Schmitt FA, Mufson EJ (2006) Hippocampal synaptic loss in early Alzheimer's disease and mild cognitive impairment. *Neurobiology of aging* 27:1372-1384.
- Scheff SW, Price DA, Schmitt FA, DeKosky ST, Mufson EJ (2007) Synaptic alterations in CA1 in mild Alzheimer disease and mild cognitive impairment. *Neurology* 68:1501-1508.
- Schindelin J, Arganda-Carreras I, Frise E, Kaynig V, Longair M, Pietzsch T, Preibisch S, Rueden C, Saalfeld S, Schmid B, Tinevez JY, White DJ, Hartenstein V, Eliceiri K, Tomancak P, Cardona A (2012) Fiji: an open-source platform for biological-image analysis. *Nature methods* 9:676-682.



- Schwenk J, Perez-Garci E, Schneider A, Kollwee A, Gauthier-Kemper A, Fritzius T, Raveh A, Dinamarca MC, Hanuschkin A, Bildl W, Klingauf J, Gassmann M, Schulte U, Bettler B, Fakler B (2016) Modular composition and dynamics of native GABAB receptors identified by high-resolution proteomics. *Nature neuroscience* 19:233-242.
- Seabrook GR, Smith DW, Bowery BJ, Easter A, Reynolds T, Fitzjohn SM, Morton RA, Zheng H, Dawson GR, Sirinathsinghji DJ, Davies CH, Collingridge GL, Hill RG (1999) Mechanisms contributing to the deficits in hippocampal synaptic plasticity in mice lacking amyloid precursor protein. *Neuropharmacology* 38:349-359.
- Shaked GM, Kummer MP, Lu DC, Galvan V, Bredesen DE, Koo EH (2006) Abeta induces cell death by direct interaction with its cognate extracellular domain on APP (APP 597-624). *FASEB journal : official publication of the Federation of American Societies for Experimental Biology* 20:1254-1256.
- Shankar GM, Walsh DM (2009) Alzheimer's disease: synaptic dysfunction and Abeta. *Molecular neurodegeneration* 4:48.
- Shankar GM, Welzel AT, McDonald JM, Selkoe DJ, Walsh DM (2011) Isolation of low-n amyloid beta-protein oligomers from cultured cells, CSF, and brain. *Methods Mol Biol* 670:33-44.
- Shankar GM, Li S, Mehta TH, Garcia-Munoz A, Shepardson NE, Smith I, Brett FM, Farrell MA, Rowan MJ, Lemere CA, Regan CM, Walsh DM, Sabatini BL, Selkoe DJ (2008) Amyloid-beta protein dimers isolated directly from Alzheimer's brains impair synaptic plasticity and memory. *Nature medicine* 14:837-842.
- Sisodia SS (1992) Beta-amyloid precursor protein cleavage by a membrane-bound protease. *Proceedings of the National Academy of Sciences of the United States of America* 89:6075-6079.
- Soba P, Eggert S, Wagner K, Zentgraf H, Siehl K, Kreger S, Lower A, Langer A, Merdes G, Paro R, Masters CL, Muller U, Kins S, Beyreuther K (2005) Homo- and heterodimerization of APP family members promotes intercellular adhesion. *The EMBO journal* 24:3624-3634.
- Sokolow S, Luu SH, Nandy K, Miller CA, Vinters HV, Poon WW, Gylys KH (2012) Preferential accumulation of amyloid-beta in presynaptic glutamatergic terminals (VGLUT1 and VGLUT2) in Alzheimer's disease cortex. *Neurobiology of disease* 45:381-387.
- Sola Vigo F, Kedikian G, Heredia L, Heredia F, Anel AD, Rosa AL, Lorenzo A (2009) Amyloid-beta precursor protein mediates neuronal toxicity of amyloid beta through Go protein activation. *Neurobiology of aging* 30:1379-1392.
- Steinbach JP, Muller U, Leist M, Li ZW, Nicotera P, Aguzzi A (1998) Hypersensitivity to seizures in beta-amyloid precursor protein deficient mice. *Cell death and differentiation* 5:858-866.
- Tamayev R, Matsuda S, Arancio O, D'Adamio L (2012) beta- but not gamma-secretase proteolysis of APP causes synaptic and memory deficits in a mouse model of dementia. *EMBO molecular medicine* 4:171-179.
- Tanzi RE (2012) The genetics of Alzheimer disease. *Cold Spring Harbor perspectives in medicine* 2.
- Van Nostrand WE, Melchor JP, Keane DM, Saporito-Irwin SM, Romanov G, Davis J, Xu F (2002) Localization of a fibrillar amyloid beta-protein binding domain on its precursor. *The Journal of biological chemistry* 277:36392-36398.
- Vertkin I, Styr B, Slomowitz E, Ofir N, Shapira I, Berner D, Fedorova T, Laviv T, Barak-Broner N, Greitzer-Antes D, Gassmann M, Bettler B, Lotan I, Slutsky I (2015) GABAB receptor deficiency causes failure of neuronal homeostasis in hippocampal networks. *Proceedings of the National Academy of Sciences of the United States of America* 112:E3291-3299.
- Walsh DM, Teplow DB (2012) Alzheimer's disease and the amyloid beta-protein. *Progress in molecular biology and translational science* 107:101-124.

- Walsh DM, Klyubin I, Fadeeva JV, Cullen WK, Anwyl R, Wolfe MS, Rowan MJ, Selkoe DJ (2002) Naturally secreted oligomers of amyloid beta protein potently inhibit hippocampal long-term potentiation in vivo. *Nature* 416:535-539.
- Wang B, Wang Z, Sun L, Yang L, Li H, Cole AL, Rodriguez-Rivera J, Lu HC, Zheng H (2014) The amyloid precursor protein controls adult hippocampal neurogenesis through GABAergic interneurons. *The Journal of neuroscience : the official journal of the Society for Neuroscience* 34:13314-13325.
- Wang ZM, Qi YJ, Wu PY, Zhu Y, Dong YL, Cheng ZX, Zhu YH, Dong Y, Ma L, Zheng P (2008) Neuroactive steroid pregnenolone sulphate inhibits long-term potentiation via activation of alpha2-adrenoreceptors at excitatory synapses in rat medial prefrontal cortex. *The international journal of neuropsychopharmacology* 11:611-624.
- Weidemann A, Konig G, Bunke D, Fischer P, Salbaum JM, Masters CL, Beyreuther K (1989) Identification, biogenesis, and localization of precursors of Alzheimer's disease A4 amyloid protein. *Cell* 57:115-126.
- Welzel AT, Maggio JE, Shankar GM, Walker DE, Ostaszewski BL, Li S, Klyubin I, Rowan MJ, Seubert P, Walsh DM, Selkoe DJ (2014) Secreted amyloid beta-proteins in a cell culture model include N-terminally extended peptides that impair synaptic plasticity. *Biochemistry* 53:3908-3921.
- White AR, Zheng H, Galatis D, Maher F, Hesse L, Multhaup G, Beyreuther K, Masters CL, Cappai R (1998) Survival of cultured neurons from amyloid precursor protein knock-out mice against Alzheimer's amyloid-beta toxicity and oxidative stress. *The Journal of neuroscience : the official journal of the Society for Neuroscience* 18:6207-6217.
- Wilhelm BG, Mandad S, Truckenbrodt S, Krohnert K, Schafer C, Rammner B, Koo SJ, Classen GA, Krauss M, Haucke V, Urlaub H, Rizzoli SO (2014) Composition of isolated synaptic boutons reveals the amounts of vesicle trafficking proteins. *Science* 344:1023-1028.
- Willem M et al. (2015) eta-Secretase processing of APP inhibits neuronal activity in the hippocampus. *Nature* 526:443-447.
- Yang L, Wang Z, Wang B, Justice NJ, Zheng H (2009) Amyloid precursor protein regulates Cav1.2 L-type calcium channel levels and function to influence GABAergic short-term plasticity. *The Journal of neuroscience : the official journal of the Society for Neuroscience* 29:15660-15668.
- Yang T, Li S, Xu H, Walsh DM, Selkoe DJ (2017) Large Soluble Oligomers of Amyloid beta-Protein from Alzheimer Brain Are Far Less Neuroactive Than the Smaller Oligomers to Which They Dissociate. *The Journal of neuroscience : the official journal of the Society for Neuroscience* 37:152-163.
- Yang T, O'Malley TT, Kanmert D, Jerecic J, Zieske LR, Zetterberg H, Hyman BT, Walsh DM, Selkoe DJ (2015) A highly sensitive novel immunoassay specifically detects low levels of soluble Abeta oligomers in human cerebrospinal fluid. *Alzheimer's research & therapy* 7:14.
- Yankner BA, Lu T (2009) Amyloid beta-protein toxicity and the pathogenesis of Alzheimer disease. *The Journal of biological chemistry* 284:4755-4759.
- Zhang D, Mably AJ, Walsh DM, Rowan MJ (2016) Peripheral Interventions Enhancing Brain Glutamate Homeostasis Relieve Amyloid beta- and TNFalpha- Mediated Synaptic Plasticity Disruption in the Rat Hippocampus. *Cerebral cortex*.
- Zheng H, Jiang M, Trumbauer ME, Sirinathsinghji DJ, Hopkins R, Smith DW, Heavens RP, Dawson GR, Boyce S, Conner MW, Stevens KA, Slunt HH, Sisoda SS, Chen HY, Van der Ploeg LH (1995) beta-Amyloid precursor protein-deficient mice show reactive gliosis and decreased locomotor activity. *Cell* 81:525-531.
- Zucker RS, Regehr WG (2002) Short-term synaptic plasticity. *Annual review of physiology* 64:355-405.



**Table 1. Primary and secondary antibodies.**

| Antibody | Type       | Antigen/epitope                | Dilution for IP | Conc. For WB | Conc. For ELISA | Dilution for AT | Source/Reference                   |
|----------|------------|--------------------------------|-----------------|--------------|-----------------|-----------------|------------------------------------|
| 3D6      | Monoclonal | A $\beta$ 1-5                  | -               | -            | 1 $\mu$ g/ml    | -               | Elan/(Johnson-Wood et al., 1997)   |
| 266      | Monoclonal | A $\beta$ 16-23                | -               | -            | 3 $\mu$ g/ml    | -               | Elan/(Seubert et al., 1992)        |
| 2G3      | Monoclonal | A $\beta$ terminating at Val40 | -               | 1 $\mu$ g/ml | -               | -               | Elan/(Johnson-Wood et al., 1997)   |
| 21F12    | Monoclonal | A $\beta$ terminating at Ile42 | -               | 1 $\mu$ g/ml | 1 $\mu$ g/ml    | -               | Elan/(Johnson-Wood et al., 1997)   |
| 1C22     | Monoclonal | A $\beta$ aggregates           | -               | -            | 3 $\mu$ g/ml    | 1:50            | Walsh lab/(Mably et al., 2015)     |
| AW7      | Polyclonal | Pan anti-A $\beta$             | 1:80            | -            | -               | -               | Walsh lab/(Mc Donald et al., 2015) |
| 22C11    | Monoclonal | APP66-81                       | -               | 1 $\mu$ g/ml | -               | 1:50            | Millipore                          |
| AB1543 P | Polyclonal | Rabbit anti-synapsin-1         | -               | -            | -               | 1:100           | Millipore/(Kay et al., 2013)       |
| 3450P    | Polyclonal | Rabbit anti-PSD95              | -               | -            | -               | 1:5             | Cell Signaling/(Kay et al., 2013)  |
| A21202   | Polyclonal | Donkey anti-mouse 488          | -               | -            | -               | 1:50            | Invitrogen                         |
| A21207   | Polyclonal | Donkey anti-rabbit 594         | -               | -            | -               | 1:50            | Invitrogen                         |

**Figure 1: The water-soluble extract of AD brain contains both A $\beta$  monomers and oligomers and perturbs short-term and long-term synaptic plasticity.**

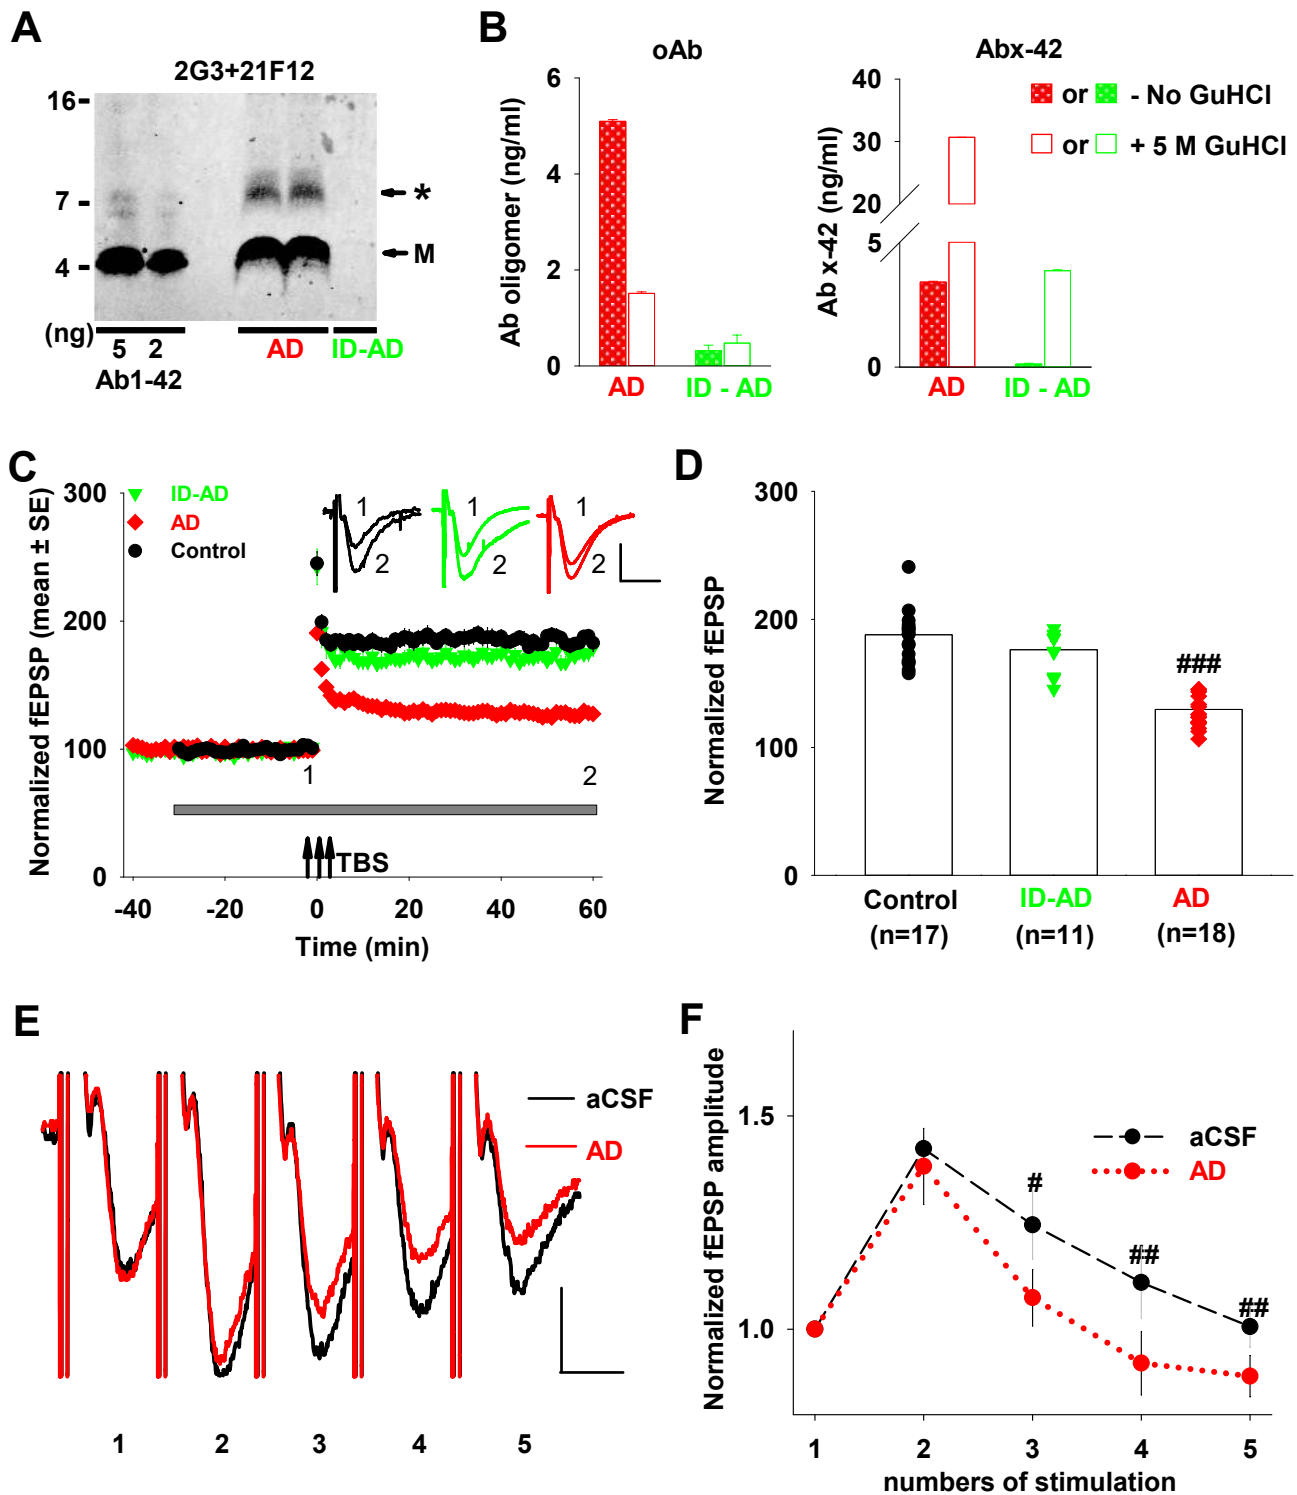

1 **Figure 1: The water-soluble extract of AD brain contains both A $\beta$  monomers and**  
2 **oligomers and perturbs short-term and long-term synaptic plasticity.**

3 **(A)** Aqueous extract of AD1 was treated with either pre-immune rabbit serum or with  
4 AW7 antiserum. Portions of the mock immunodepleted sample (AD, red) and the AW7  
5 immunodepleted sample (ID-AD, green) were then analyzed by IP/WB, using AW7 for  
6 IP and a combination of 2G3 and 21F12 for WB. **M** denotes A $\beta$  monomer and \*  
7 indicates a broad smear ~7–8 kDa. No specific bands were detected above 16 kDa  
8 marker and the blot was cropped accordingly. **(B)** AD (red) and ID-AD (green) samples  
9 were incubated +/- 5 M GuHCl and analyzed using immunoassays that preferentially  
10 recognize A $\beta$  oligomers (1C22-3D6b, left panel) or A $\beta$ 42 monomer (266-21F12b, right  
11 panel). Values shown are the mean  $\pm$  SEM of triplicate measurements. **(C)** Time  
12 course plots show that the AD sample but not the ID-AD sample blocked hippocampal  
13 LTP. The gray horizontal bar indicates the time period when sample was present in the  
14 bath. 1, 2, indicate example traces from time points just prior to the theta burst  
15 stimulation ( $\uparrow\uparrow\uparrow$  TBS) (1) and 60 min after TBS (2), respectively. The aCSF control is  
16 shown using black circles; AD treatment is shown using red diamonds and ID-AD with  
17 green downward triangles. Each slice used for each treatment was from a different  
18 animal. Scale bar 0.2 mV, 10 ms. **(D)** Histogram plots of the average potentiation for  
19 the last 10 min of the traces shown in **C**. Treatment of slices with AD sample  
20 significantly inhibited LTP compared to the aCSF vehicle control ( $F=4.26$ ,  $p=6.98E-9$ )  
21 and ID-AD treatment ( $F=4.14$ ,  $p=3.56E-12$ ); in contrast ID-AD had no effect on LTP  
22 relative to the vehicle control ( $F=4.23$ ,  $p=0.16$ ); One Way ANOVA test. Symbols are the

23 same as in panel **C**. **(E)** Representative traces of averaged field recordings were  
24 collected after 5 stimulation bursts (inter-stimulation interval 20 ms, inter-burst interval  
25 30 s) before (black, aCSF) and 30 min after perfusion with the AD sample (red). The  
26 trace shown for the AD samples are scaled so that the first response matches that of  
27 the aCSF control. Scale bars: 0.5 mV, 10 ms. **(F)** fEPSPs amplitude after 2 to 5  
28 stimulations were normalized to the value obtained after the first stimulation. Compared  
29 to vehicle control, AD treatment induced a small but significant decrease in short-term  
30 synaptic facilitation, ( $p=0.02$ ) after the 3<sup>rd</sup>, ( $p=0.004$ ) the 4<sup>th</sup> stimulation and 5<sup>th</sup>  
31 stimulation ( $p=0.004$ );  $n = 6$ , student t-test. Values shown are the mean  $\pm$  SEM. #  $p <$   
32 0.05; ##  $p < 0.01$ ; ###  $p < 0.001$ .

**Figure 2: AD brain-derived A $\beta$  affects both excitatory and inhibitory synaptic inputs, causing disruption of the excitatory/inhibitory ratio at individual CA1 neurons.**

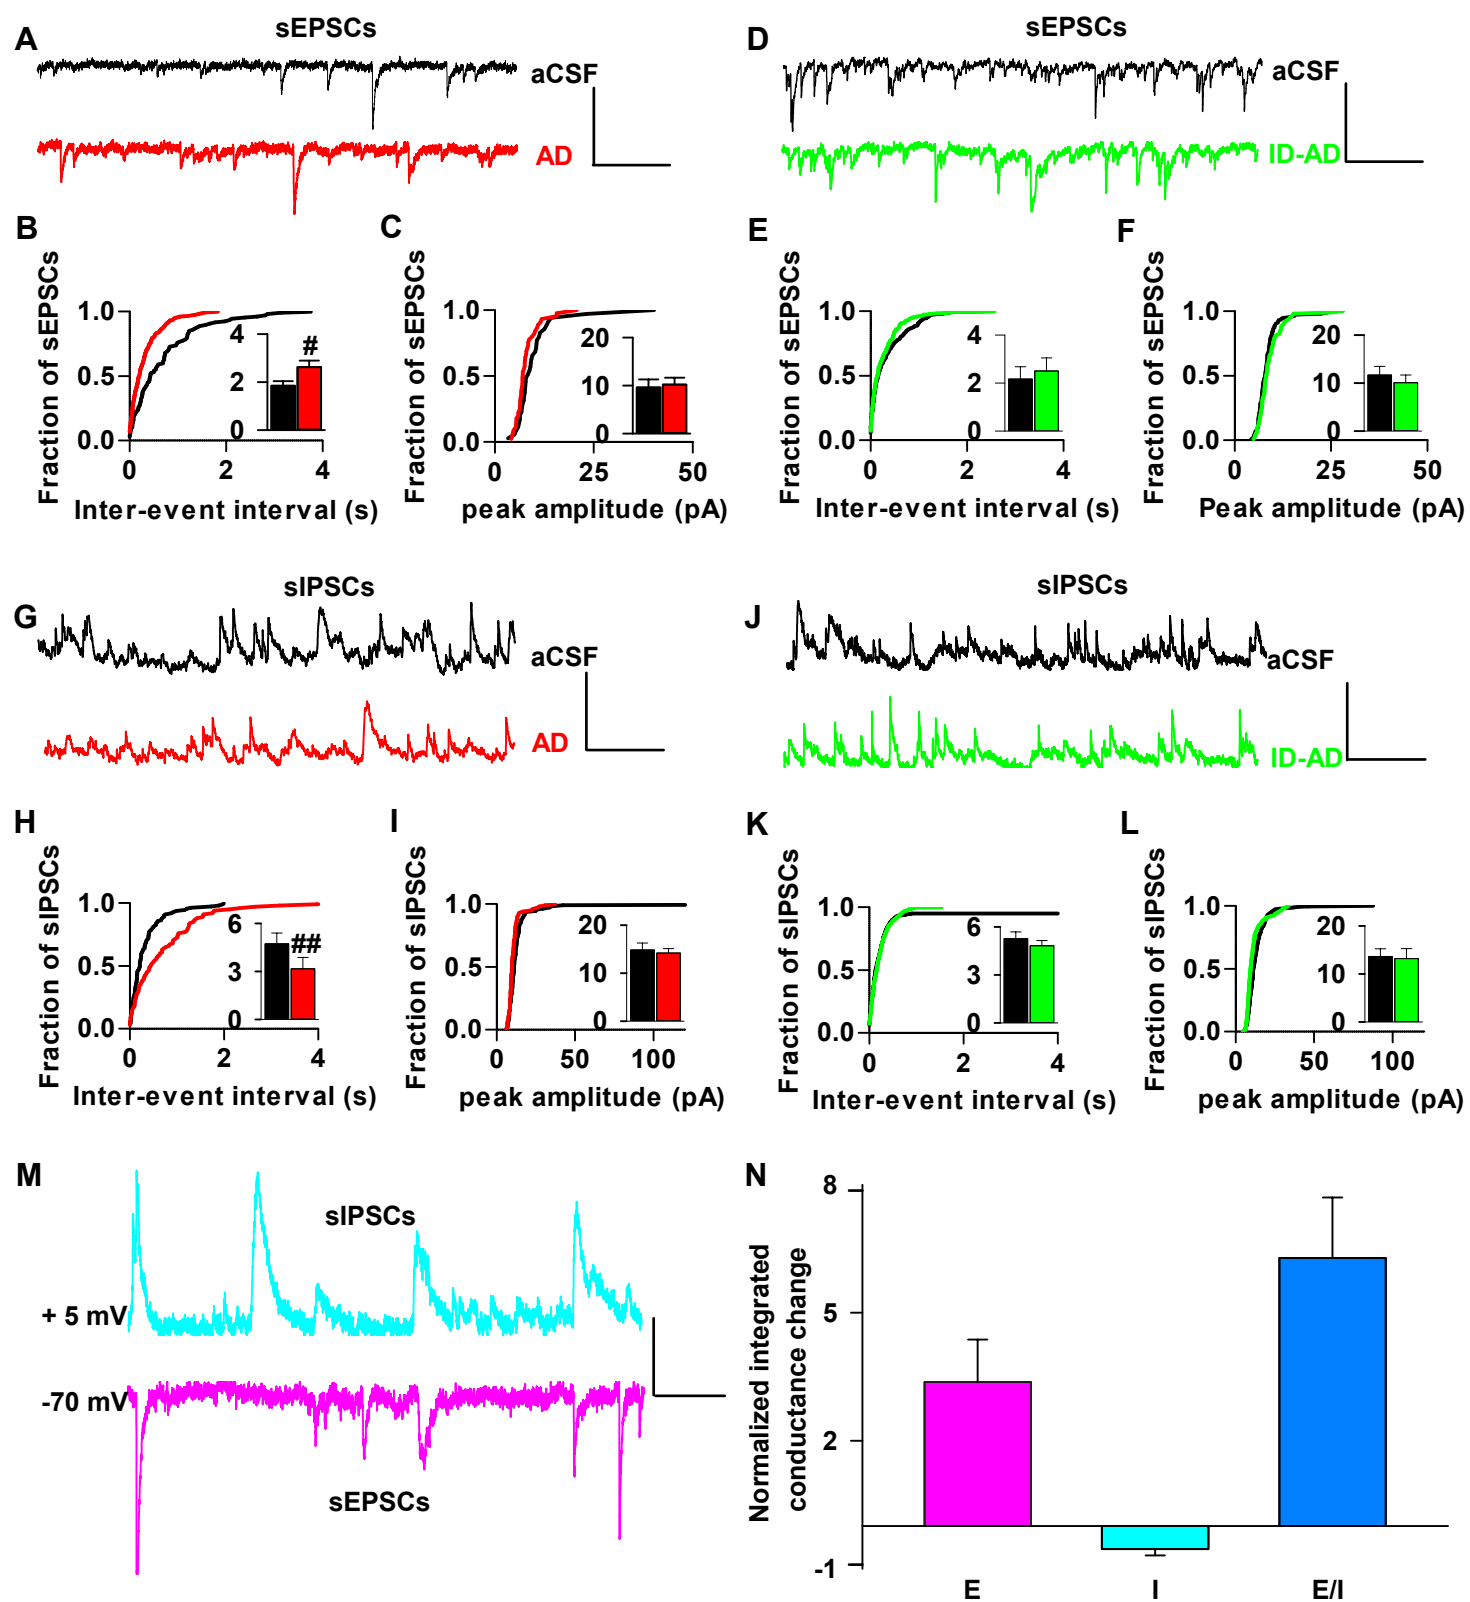

1 **Figure 2: AD brain-derived A $\beta$  affects both excitatory and inhibitory synaptic**  
2 **inputs, causing disruption of the excitatory/inhibitory ratio at individual CA1**  
3 **neurons.**

4 **(A, D)** Example traces of spontaneous excitatory post-synaptic currents (sEPSCs)  
5 before (aCSF, black) and 30 min after addition of sample (AD, red; ID-AD, green) were  
6 recorded from individual pyramidal neurons in the hippocampal CA1 area of brain slices  
7 with the holding potential fixed at -70 mV. Scale bars: 20 pA, 700 ms. **(B)** 30 min of AD  
8 treatment decreased cumulative distributions of inter-event intervals and increased  
9 mean frequency (insert) ( $p=1.65E-6$ , K-S test;  $p< 0.02$ , student t-test;  $n = 7$ ), but **(C)** did  
10 not change the cumulative distributions or the mean value (insert) of the amplitude of  
11 sEPSCs ( $n = 7$ ). **(E, F)** The ID-AD sample had no effect on either frequency or  
12 amplitude of sEPSCs ( $n = 6$ ). **(G, J)** Example traces of spontaneous inhibitory post-  
13 synaptic currents (sIPSCs) before (aCSF, black) and 30 min after treatment (AD, red;  
14 ID-AD, green) were recorded on the same individual pyramidal neurons upon increasing  
15 the holding potential to 5 mV. Scale bars: 20 pA, 700 ms. **(H)** 30 min of treatment with  
16 the AD sample increased inter-event intervals and decreased mean frequency (insert)  
17 of sIPSCs (red) versus aCSF (black) ( $p=6.19E-6$ , K-S test;  $p=0.008$ , student t-test;  $n =$   
18  $7$ ). **(I)** Treatment with the AD sample did not affect the amplitude of sIPSCs ( $n = 7$ ) and  
19 the ID-AD sample had no effect on frequency **(K)** or the amplitude **(L)** of sIPSCs versus  
20 aCSF control ( $n = 7$ ). **(M)** Representative traces of sIPSCs and sEPSCs from the same  
21 pyramidal neuron show charge transfer measured as the area of events above the  
22 threshold in the aCSF control. Scale bars: 10 pA, 200 ms. **(N)** Integrated conductance  
23 were measured between 30 - 35 min after addition of AD application was normalized to

24 the value of 5 min before addition of AD. Mean excitatory integrated conductance  
25 increased and mean inhibitory integrated conductance decreased upon treatment of AD  
26 (E: excitatory input/sEPSCs; I: inhibitory input/sIPSCs). ##  $p < 0.01$ .

**Figure 3: Expression of APP is required for the plasticity-disrupting activity of A $\beta$ -containing AD brain extracts.**

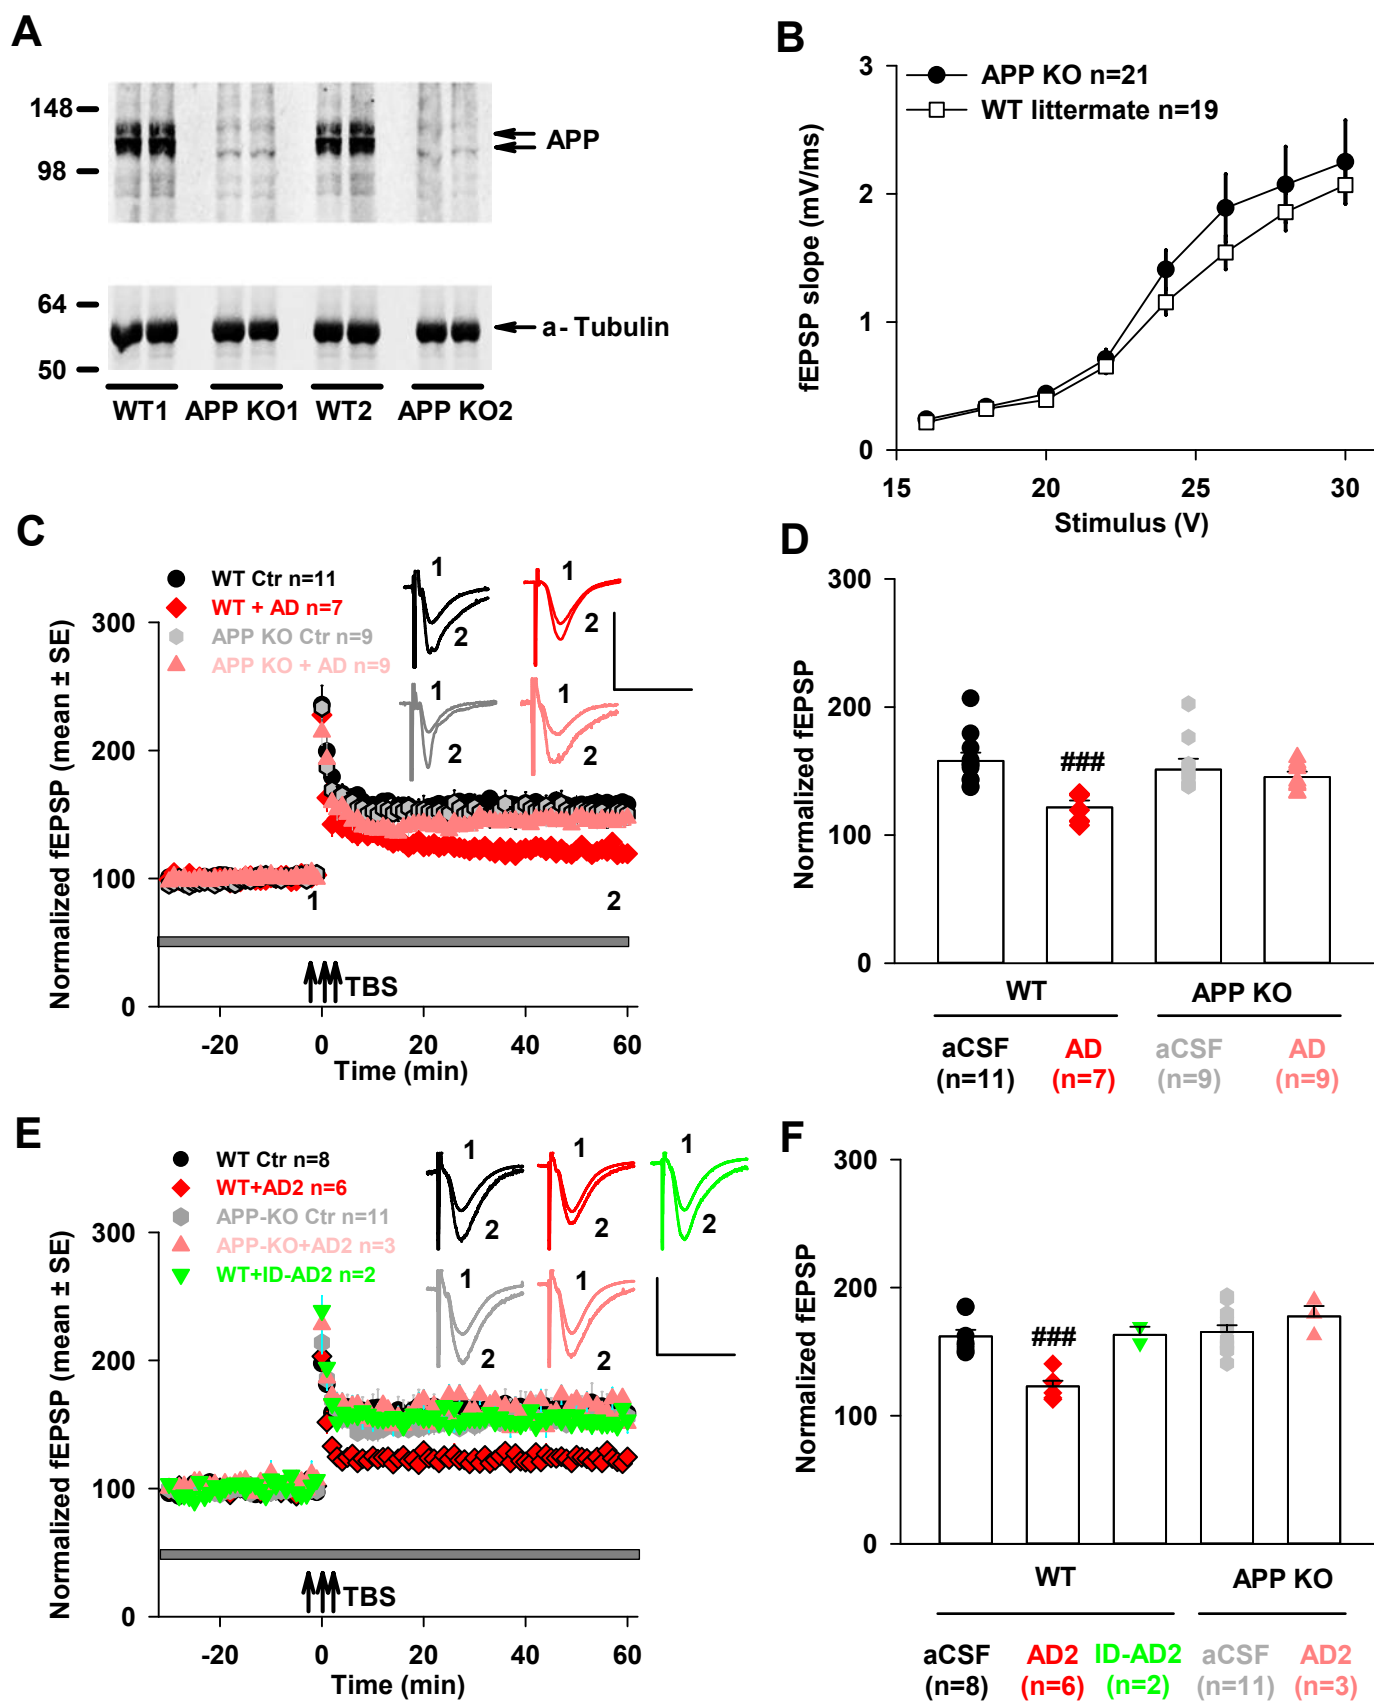



1 **Figure 3: Expression of APP is required for the plasticity-disrupting activity of A $\beta$ -**  
2 **containing AD brain extracts.**

3 **(A)** Aqueous extracts of mouse brain slices used for electrophysiology were analyzed  
4 for APP by Western Blotting with 22C11. Full-length APP was readily detected in  
5 extracts from wild type littermate mice (WT) but not APP knockout mice (APP KO).  
6 Slices from 2 different APP KOs (KO1 and KO2) and 2 different WTs (WT1 and WT2)  
7 are shown. **(B)** Input/output curves recorded in the hippocampal CA1 area are highly  
8 similar for both WT and APP KO mouse brain slices ( $p=0.19$ , One Way ANOVA test).  
9 Values are mean  $\pm$  SEM. **(C)** LTP recorded in hippocampal CA1 was similar in brain  
10 slices from WT and APP KO mice (WT Ctr, black dots vs. APP KO Ctr, gray hexagons,  
11  $p=0.79$ , comparison of the last 10 min recording using One Way ANOVA test).  
12 However, the extract from AD1 brain extract blocked LTP in WT but not in APP KO mice  
13 brain slices. Horizontal gray bar indicates the duration during when sample was present.  
14 1, 2, indicate example traces from time points just prior to the theta burst stimulation  
15 ( $\uparrow\uparrow\uparrow$  TBS) (1) and 60 min after TBS (2), respectively. The aCSF control in WT mice is  
16 shown with black circles; AD treatment in WT mice is shown in red diamonds; the aCSF  
17 control in APP KO mice is shown in gray hexagons and AD treatment in APP KO mice  
18 is shown using pink upward triangles. WT slices for each treatment came from different  
19 animals; the APP KO slices came from a total of 4 APP KO mice. Scale bars: 0.5 mV,  
20 15 ms. **(D)** Comparison of average potentiation from last 10 min of LTP recording ( $p$   
21  $F=4.5$ ,  $p=0.0005$ , Control vs. AD in WT mice;  $F=4.5$ ,  $p=0.41$ , Control vs. AD in APP KO  
22 mice; One Way ANOVA test). Symbols correspond to those in panel **C**. **(E)** Extract of a  
23 second brain (AD2) blocked hippocampal LTP in WT brain slices, but not in APP KO

24 brain slices. Horizontal gray bar indicates the duration when sample was present. 1, 2,  
25 indicate example traces from time points just prior to the theta burst stimulation ( $\uparrow\uparrow\uparrow$   
26 TBS) (1) and 60 min after TBS (2), respectively. Treatment of WT slices with aCSF  
27 control is shown using black circles; AD2 treatment of WT slices in red diamonds; ID-  
28 AD2 treatment in WT slices in green downward triangles. Treatment of APP KO slices  
29 with aCSF control is in gray hexagons and treatment of APP KO slices with AD2 is in  
30 pink upward triangles. WT slices for each treatment came from different animals; The  
31 APP KO slices came from a total 5 APP KO mice. Scale bars: 0.5 mV, 15 ms. **(F)**  
32 Comparison of average potentiation from last 10 min of LTP recording ( $F=4.8$ ,  $p=0.0001$ ,  
33 aCSF control vs. AD2 in WT mice;  $F=5.3$ ,  $p=0.92$ , ACSF control vs. ID-AD2 in WT mice;  
34  $F=4.8$ ,  $p=0.29$ , aCSF control vs. AD2 in APP KO mice; One Way ANOVA test). Symbol  
35 denoting the different treatment groups corresponds to those in panel E. ###  $p < 0.001$ .

**Figure 4: APP knock out occluded the effects of A $\beta$ -containing AD brain extracts on both excitatory and inhibitory postsynaptic currents, and rescued the disruption of E/I balance.**

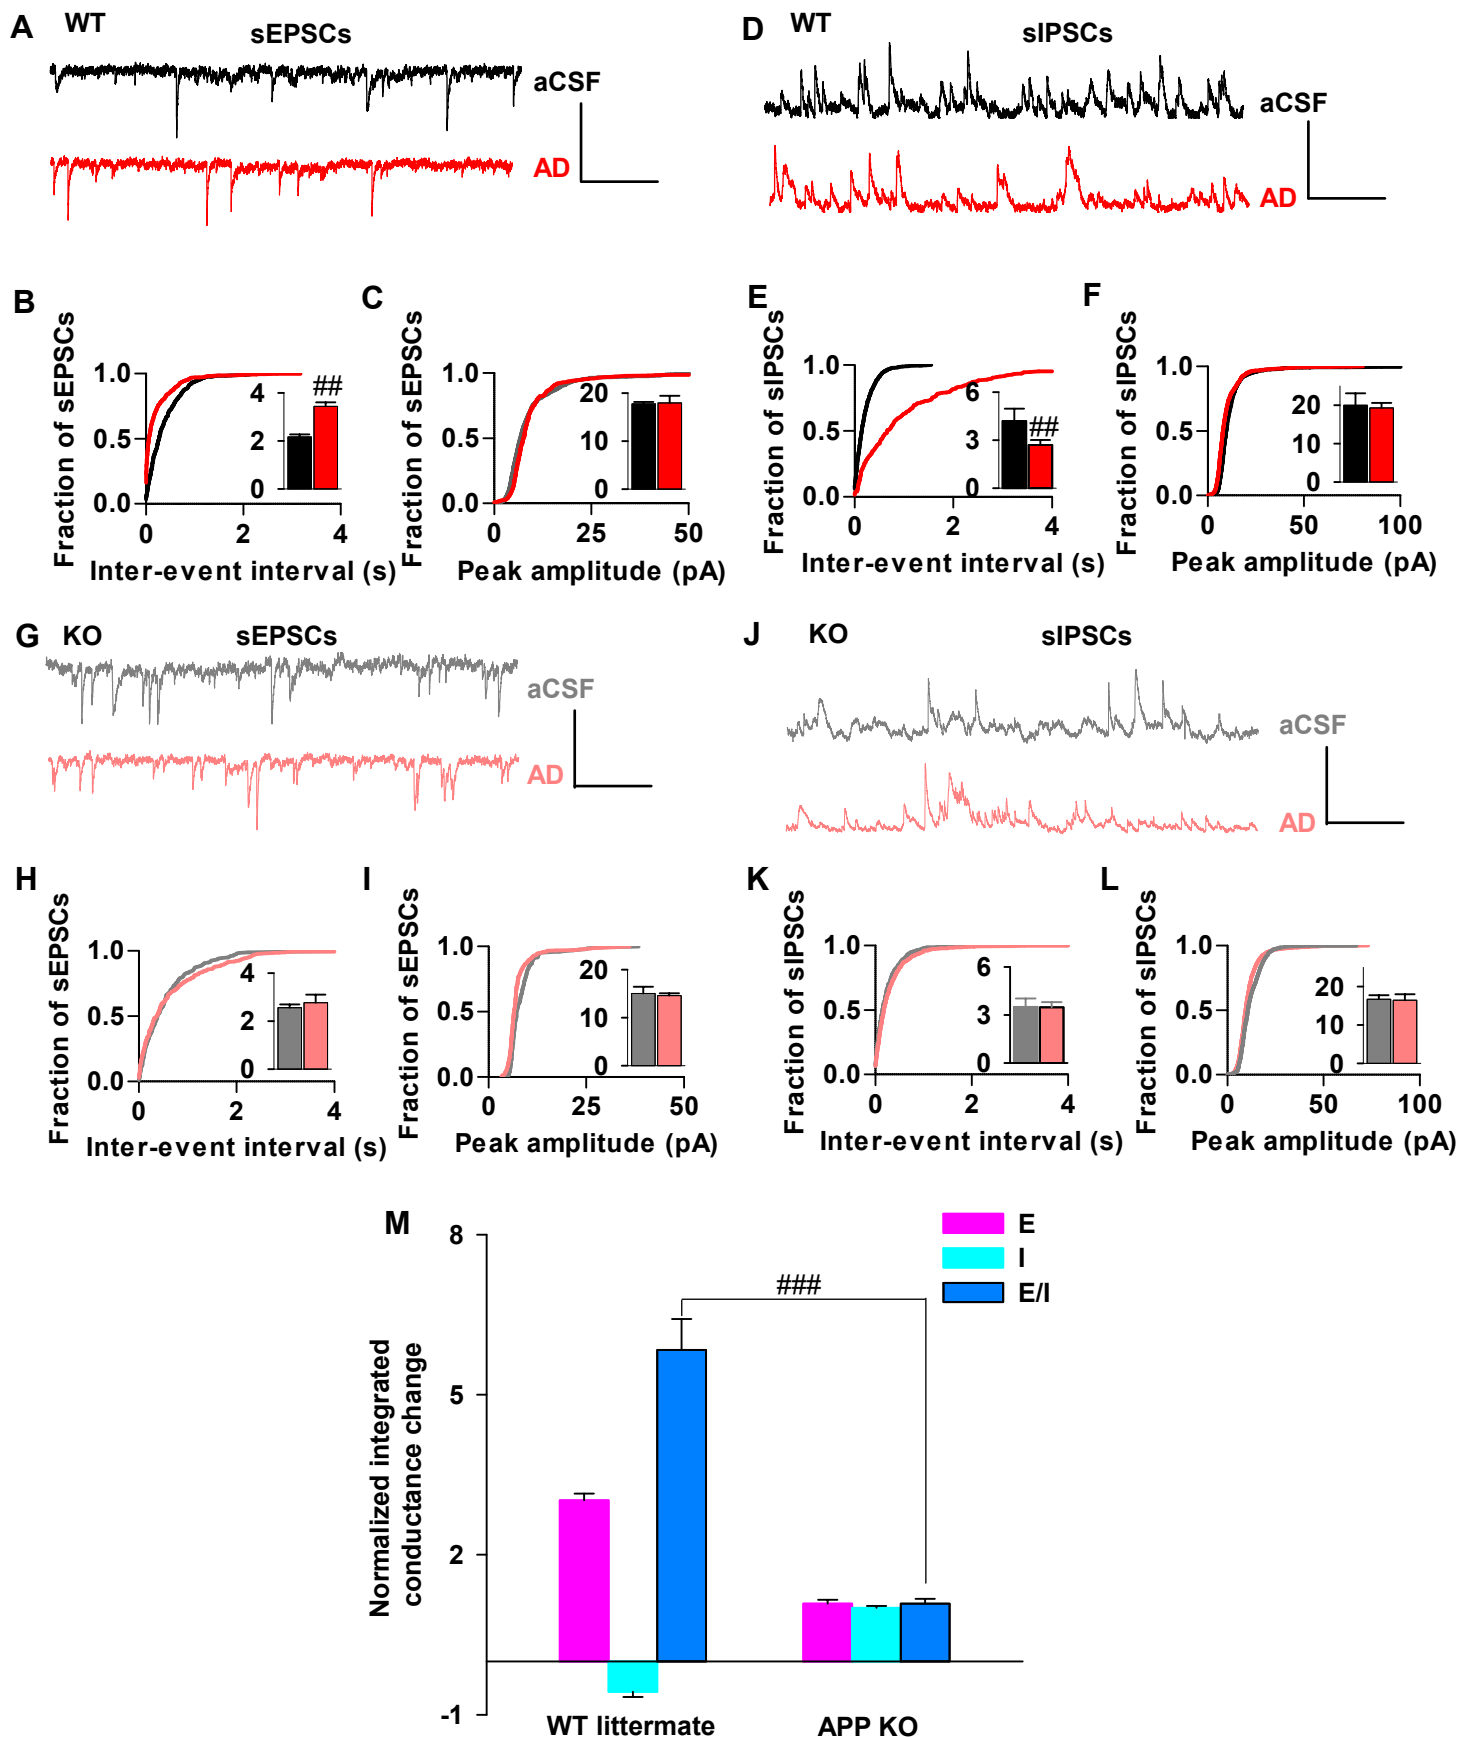

1 **Figure 4: APP knock out occluded the effects of A $\beta$ -containing AD brain extracts**  
2 **on both excitatory and inhibitory postsynaptic currents, and rescued the**  
3 **disruption of E/I balance.**

4 **(A, D)** Example traces of sEPSCs **(A)** and sIPSCs **(D)** before (aCSF, black) and 30 min  
5 after addition of AD1 extract (AD, red) on WT hippocampal brain slices. Scale bars: 20  
6 pA, 700 ms. **(B)** Treatment with AD1 extract decreased inter-event intervals and  
7 increased mean frequency (insert) of sEPSCs ( $p=6.34E-15$ , K-S test;  $p=0.003$ , student  
8 t-test;  $n = 5$ ), but **(C)** did not significantly change the cumulative distributions or the  
9 mean value (insert) of the amplitude of sEPSCs ( $n = 5$ ) on WT slices. **(E)** 30 min of AD  
10 treatment increased inter-event intervals and decreased mean frequency (insert) of  
11 sIPSCs ( $p=9.44E-20$ , K-S test;  $p=0.006$ , student t-test;  $n = 5$ ), but **(F)** did not affect the  
12 cumulative distributions or the mean value (insert) of the amplitude of sIPSCs ( $n = 5$ ) on  
13 WT slices. **(G, J)** Example traces of spontaneous post-synaptic currents (sEPSCs, **G**;  
14 sIPSCs, **J**) before (aCSF, gray) and 30-40 min following addition of AD1 extract (AD,  
15 pink) on APP KO mice hippocampal brain slices. Scale bars: 20 pA, 700 ms. **(H)**  
16 Treatment with AD sample affected neither frequency nor amplitude **(I)** of sEPSCs  
17 ( $p=0.14$ , K-S test;  $p=0.26$ , student t-test;  $n = 6$ ) on APP KO mice. Similarly, treatment of  
18 APP KO neurons with AD1 did not change frequency **(K)** or the amplitude **(L, p=0.58, K-**  
19 **S test;  $p=0.25$  student t-test;  $n = 6$ ) of sIPSCs. **(M)** Application of A $\beta$ -containing AD  
20 brain extract significantly changed the intergrated conductance of both excitatory **(E)**  
21 and inhibitory **(I)** input to neurons and disrupted the E/I balance in WT animals, but not  
22 in APP KO mice ( $p=0.001$ , E/I in WT vs. E/I in APP KO, One Way ANOVA test).**

**Figure 5: A $\beta$  binding to synaptic terminals requires expression of APP.**

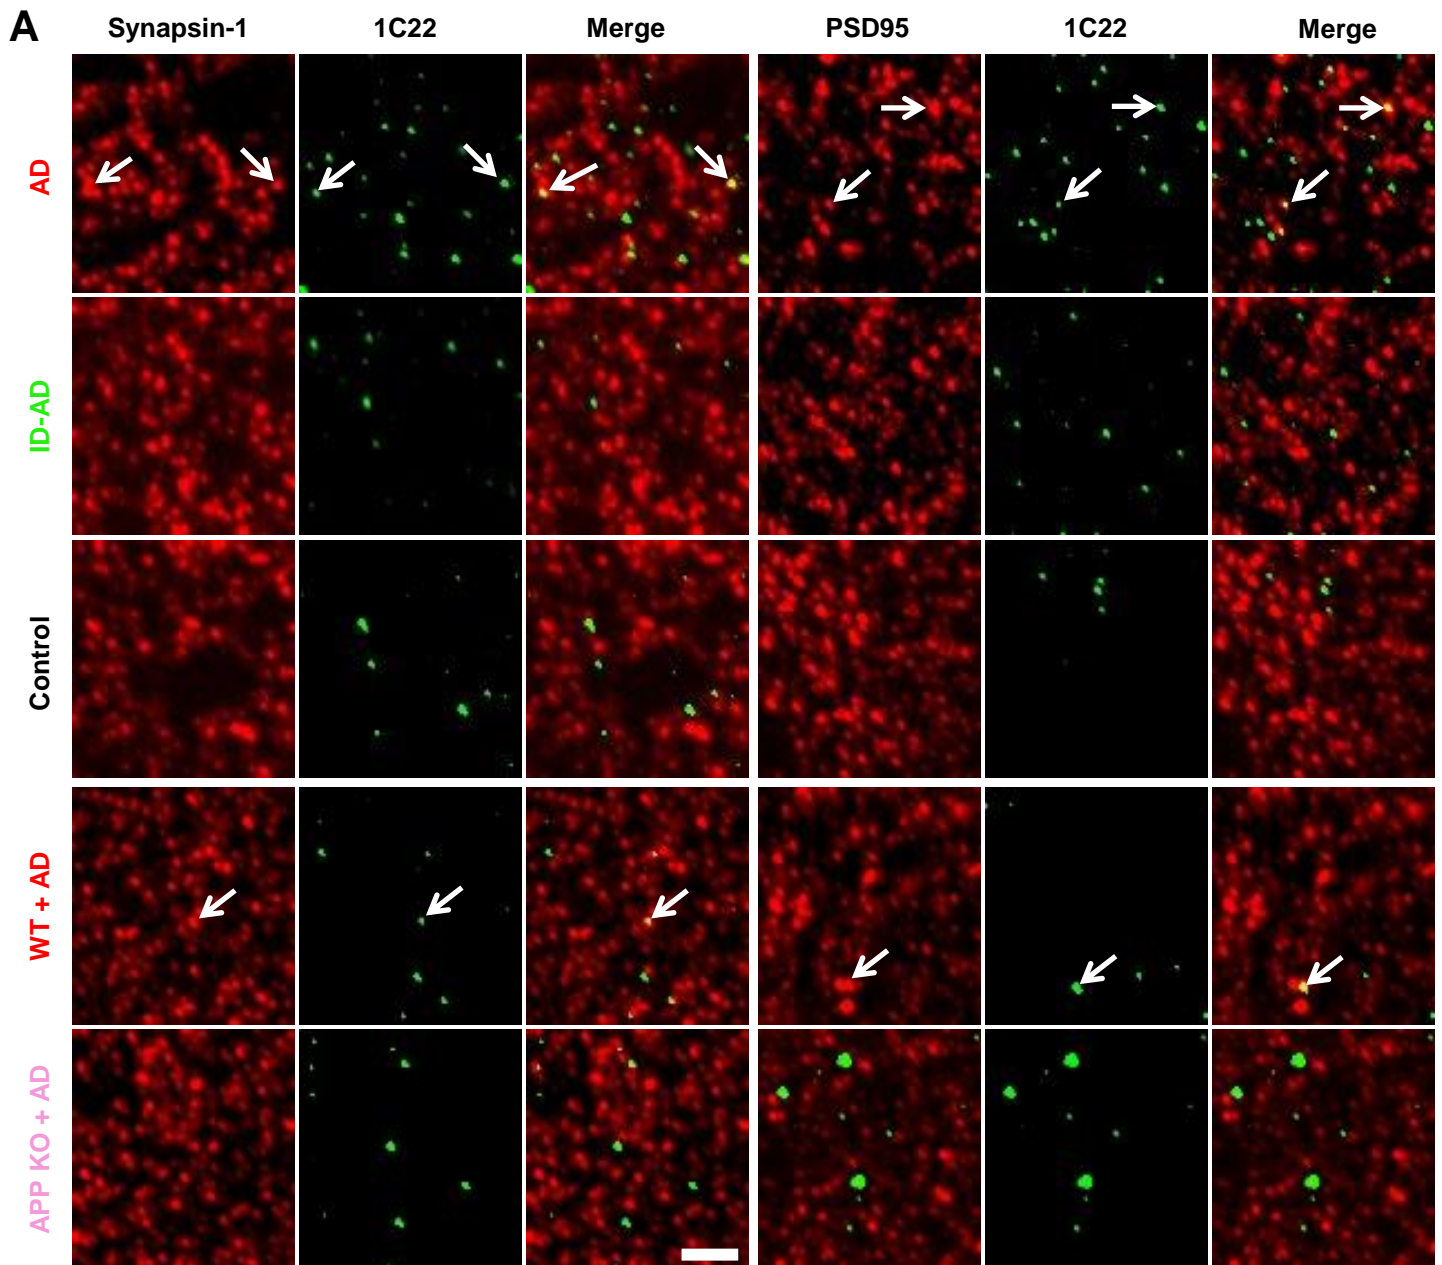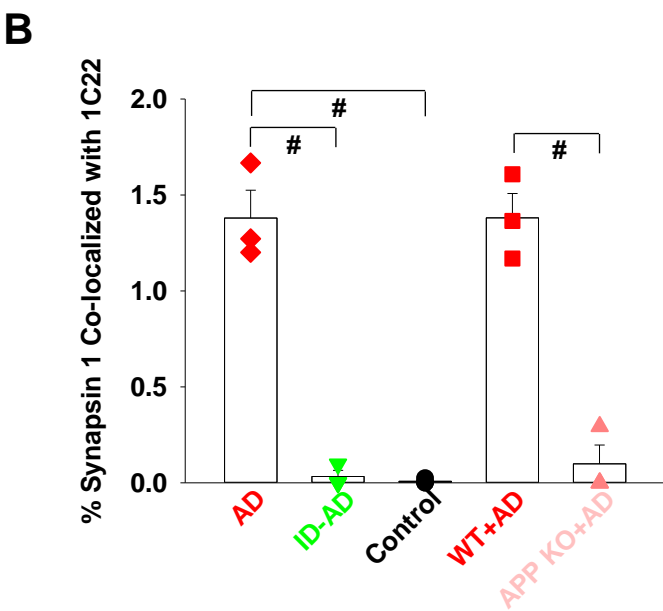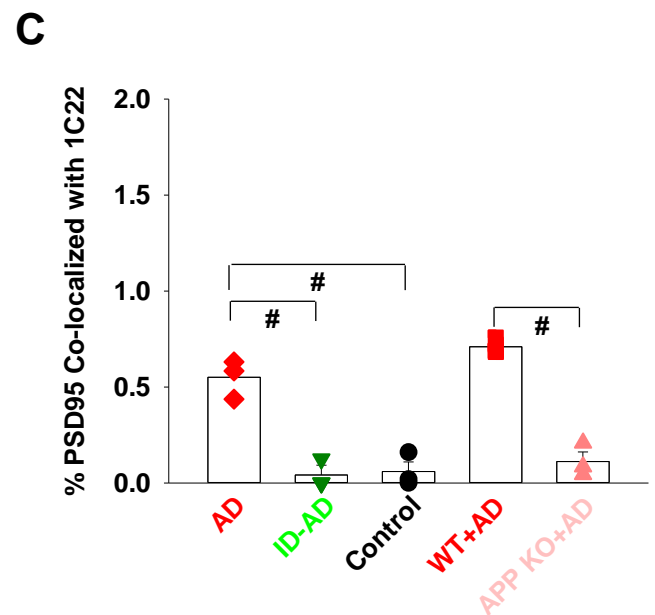

1 **Figure 5: A $\beta$  binding to synaptic terminals requires expression of APP.**

2 (A) Array tomography of hippocampi stained for A $\beta$ , PSD95 (post-synapses) and  
3 synapsin-1 (pre-synapses) reveal co-localization of A $\beta$  at synapses in slices incubated  
4 with AD brain extract. (B and C) The amount of synaptic 1C22 staining was significantly  
5 greater in slices incubated with AD extract, than in slices incubated with aCSF or ID-AD  
6 extract based on (B) co-localization of 1C22 and synapsin 1 staining (Kruskal Wallis test  
7 ( $\chi^2(4)=10.844$ ,  $p=0.028$ ) Dunns post-hoc vs. control  $p=0.021$ ), and (C) 1C22 and PSD95  
8 co-localization (Kruskal Wallis test for PSD95 ( $\chi^2(4)=11.583$ ,  $p=0.021$ , Dunns post-hoc  
9 vs. control  $p=0.010$ ). Importantly, when slices from APP KO mice were incubated with  
10 AD extract there was no significant co-localization of 1C22 staining with either synapsin  
11 1 (B) (Dunns post-hoc vs. control  $p=1.000$ ) or PSD-95 (C) (Dunns post-hoc vs. control  
12  $p=1.000$ ). Graphs represent the medians  $\pm$  the interquartile range per treatment. Each  
13 data point is derived from the analysis of  $\sim 3,500$  synapses imaged per brain slices.  
14 Within a treatment group the 3 slices used were from different mice (B and C). Arrows  
15 indicate specific examples of 1C22 staining co-localizing with pre- or post-synapses,  
16 Scale bar is 2  $\mu\text{m}$  (A). #  $P < 0.05$

Figure 3 – figure supplement 1: APP ablation occludes the effect of AD brain extract on short-term facilitation.

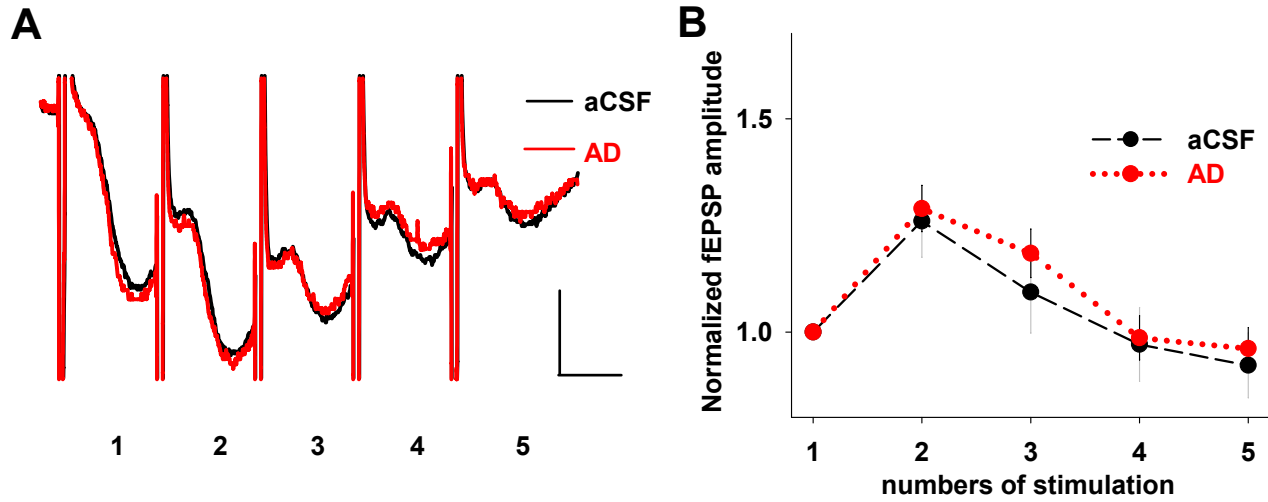

1 **Figure 3 – figure supplement 1: APP ablation occludes the effect of AD brain**  
2 **extract on short-term facilitation.**

3 **(A)** Representative traces of averaged field recordings were collected after 5 stimulation  
4 bursts (inter-stimulation interval 20 ms, inter-burst interval 30 s) before (black, aCSF)  
5 and 30 min after perfusion with the AD sample (red) on brain slice from APP KO mouse.  
6 Scale bars: 0.5 mV, 10 ms. **(B)** fEPSPs amplitude after 2 to 5 stimulations were  
7 normalized to the value obtained after the first stimulation. Values are mean  $\pm$  SEM.  
8 There is no significant difference between aCSF control and the presence of AD brain  
9 extract application (n=5, F=5.32, P=0.7, One Way ANOVA test).



**Figure 3 – figure supplement 2: Characterization of A $\beta$  in the water-soluble extract from AD2 brain.**

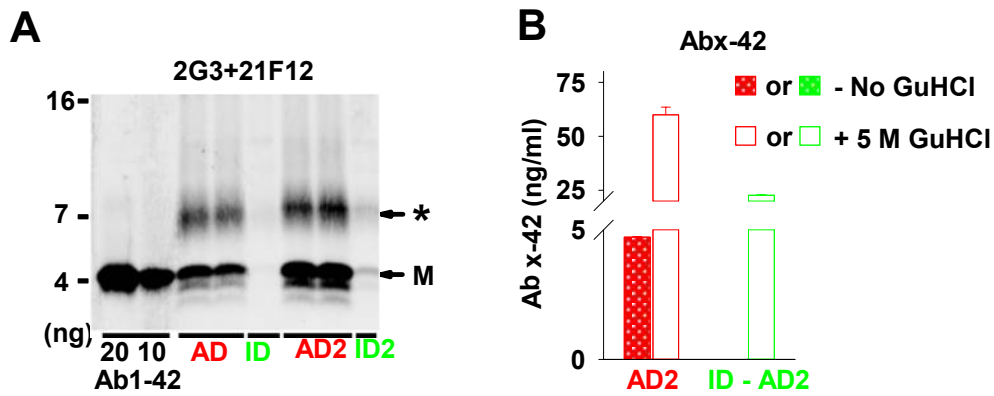

1 **Figure 3 – figure supplement 2: Characterization of A $\beta$  in the water-soluble**  
2 **extract from AD2 brain.**

3 **(A)** Aqueous extract of AD1 and AD2 were treated with either pre-immune serum or  
4 AW7 antiserum. Portions of the mock immunodepleted sample (AD1 and AD2, red) and  
5 the AW7 immunodepleted sample (ID-AD1 and ID-AD2, green) were then analyzed by  
6 IP/WB, using AW7 for IP and a combination of 2G3 and 21F12 for WB. **M** denotes A $\beta$   
7 monomer and \* indicates a broad smear ~7–8 kDa. No specific bands were detected  
8 above 16 kDa marker and the blot was cropped accordingly. **(B)** AD2 (red) and ID-AD2  
9 (green) samples were incubated +/- 5 M GuHCl and analyzed using an immunoassay  
10 that preferentially recognize A $\beta$ x-42 monomer (266-21F12b). AW7 ID reduced the  
11 monomer signal from  $4.73 \pm 0.02$  ng/ml to undetectable levels. Upon GuHCl treatment,  
12  $60 \pm 3.52$  ng/ml of A $\beta$  x-42 was detected in AD2 and AW7 ID decreased this to  $22.72 \pm$   
13  $0.7$  ng/ml.

**Figure 3 – figure supplement 3: APP ablation occludes the plasticity-disrupting activity of AD3 brain extract.**

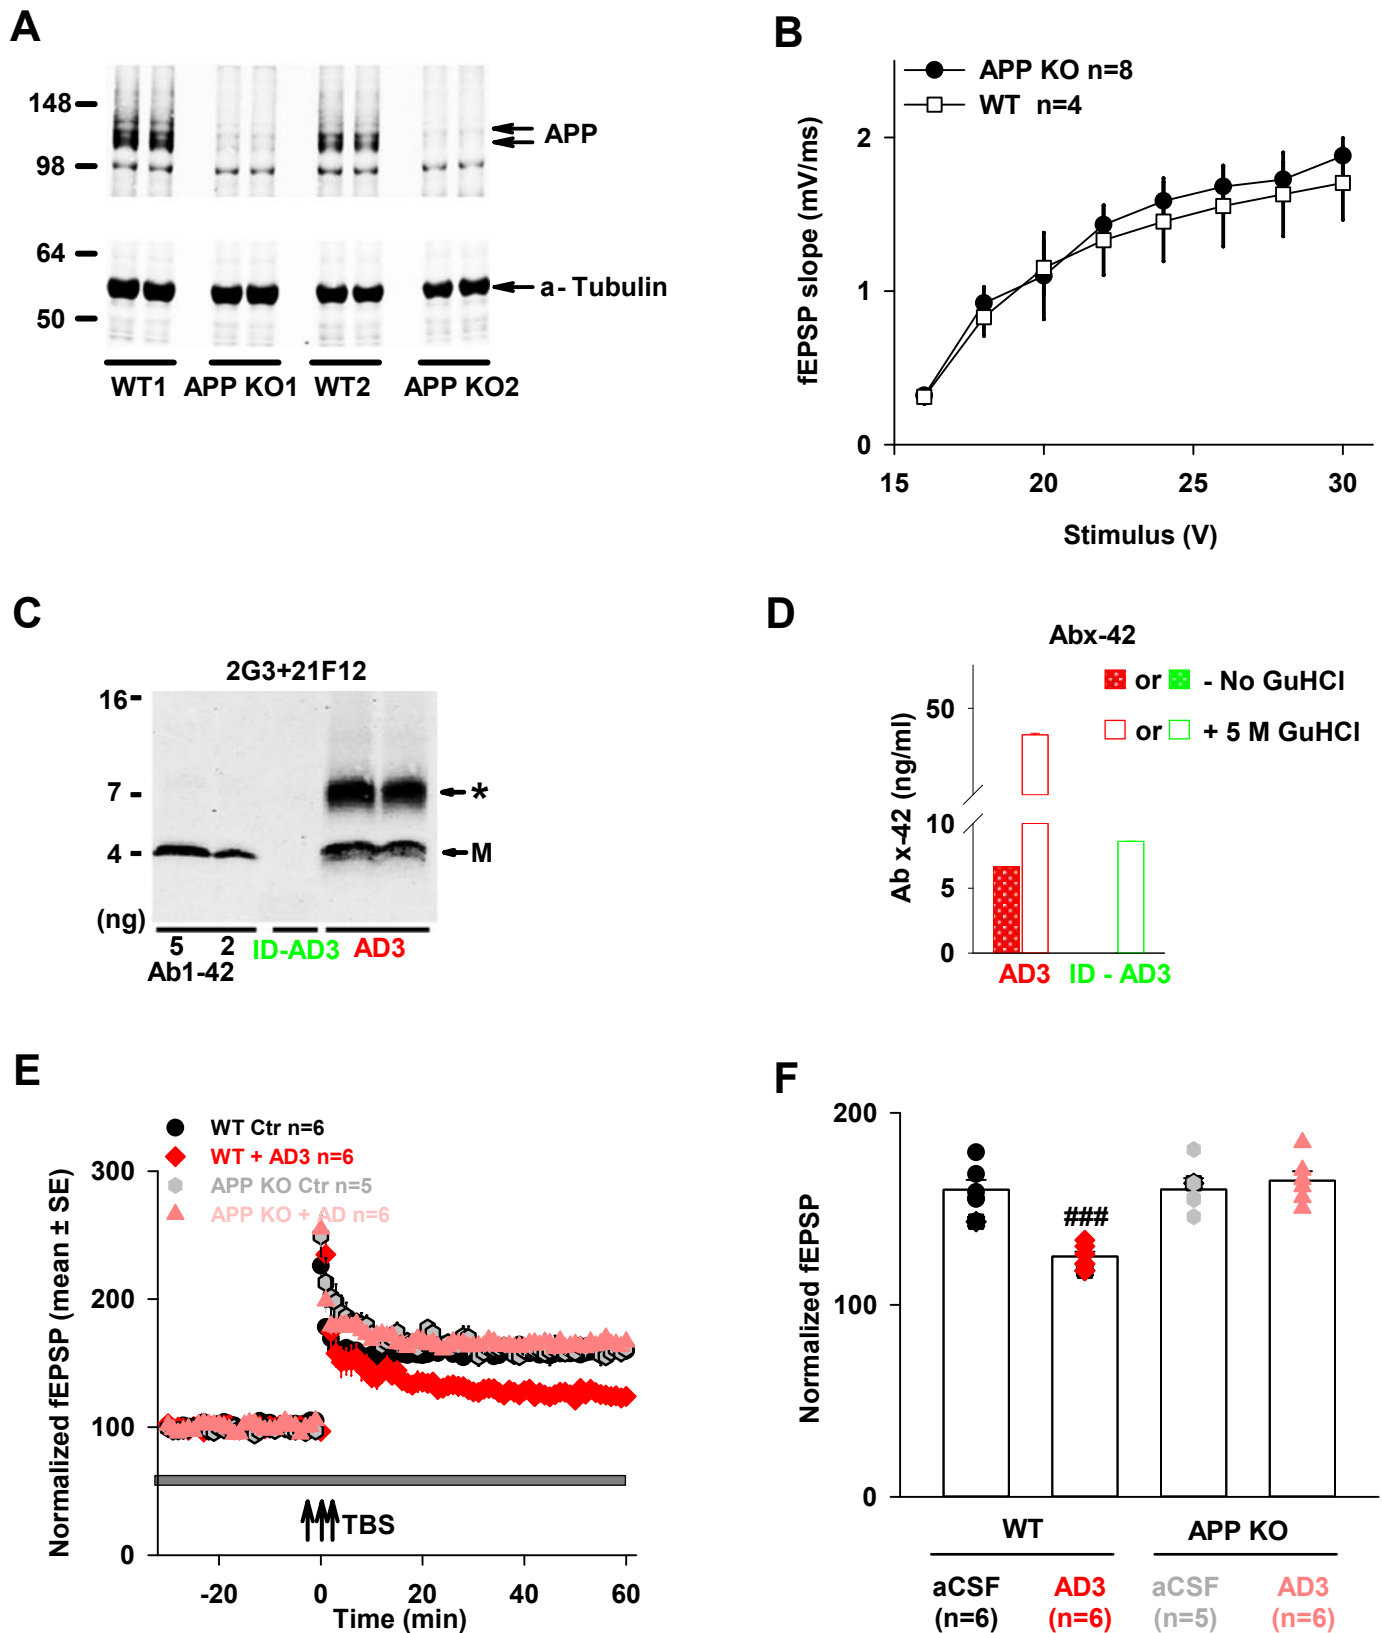

1 **Figure 3 - figure supplement 3: APP ablation occludes the plasticity-disrupting**  
2 **activity of AD3 brain extract.**

3 **(A)** Wild type (WT) and APP knock-out (KO) mouse brain slices used for  
4 electrophysiology were analyzed for APP by Western Blotting with 22C11. Full-length  
5 APP was readily detected in extracts from WT but not APP KO. Slices from 2 different  
6 KOs (KO1 and KO2) and WTs (WT1 and WT2) mice are shown. **(B)** Input/output  
7 curves recorded in the hippocampal CA1 area are highly similar for both WT and APP  
8 KO mouse brain slices ( $F=4.6$ ,  $p=0.73$ , One Way ANOVA test). Values are mean  $\pm$  SEs.  
9 **(C)** Aqueous extract of AD3 was treated with either pre-immune serum or with AW7  
10 antiserum. Portions of the mock immunodepleted sample (AD3, red) and the AW7  
11 immunodepleted sample (ID-AD3, green) were then analyzed by IP/WB, using AW7 for  
12 IP and a combination of 2G3 and 21F12 for WB. **M** denotes A $\beta$  monomer and \*  
13 indicates a broad smear  $\sim$ 7–8 kDa. No specific bands were detected above 16 kDa  
14 marker and the blot was cropped accordingly. **(D)** AD3 (red) and ID-AD3 (green)  
15 samples were incubated  $\pm$  5 M GuHCl and analyzed using an immunoassay that  
16 preferentially recognize A $\beta$ 42 monomer (266-21F12b). AW7 ID reduced monomer from  
17  $6.65 \pm 0.01$  ng/ml to undetectable level without GuHCl treatment. Upon treatment with  
18 GuHCl, the amount of A $\beta$ 42 increased to  $46.94 \pm 0.2$  ng/ml in AD3 and this was  
19 reduced to  $8.62 \pm 0.1$  ng/ml by immunodepletion. **(E)** LTP recorded in hippocampal  
20 CA1 was similar in brain slices from WT and APP KO mice. Notably, the extract from  
21 AD3 blocked LTP in WT but not in APP KO mice brain slices. Horizontal gray bar  
22 indicates the duration during when sample was present. The aCSF control in WT mice  
23 is shown with black circles; AD treatment in WT mice is shown in red diamonds; the

24 aCSF control in APP KO mice is shown in gray hexagons and AD treatment in APP KO  
25 mice is shown using pink upward triangles. WT slices for each treatment came from  
26 different animals; the APP KO slices came from a total of 4 APP KO mice. Theta burst  
27 stimulation (↑↑↑ TBS). Scale bars: 0.5 mV, 15 ms. **(F)** Comparison of average  
28 potentiation from last 10 min of LTP recording ( $F=4.96$ ,  $p= 0.0001$ , Control vs. AD in WT  
29 mice;  $F=5.12$ ,  $p= 0.56$ , Control vs. AD in APP KO mice; One Way ANOVA test).  
30 Symbols correspond to those in panel **E**.
